# Supplementary material for: The UroLife study: protocol for a Dutch prospective cohort on lifestyle habits in relation to non-muscle-invasive bladder cancer prognosis and health-related quality of life
Source: PubMed Central journal article supplement — BMJ Open. 2019 Oct 16;9(10):e030396. doi: 10.1136/bmjopen-2019-030396 (PMC6797314; doi:10.1136/bmjopen-2019-030396), 2019-10-16
Supplement: bmjopen-2019-030396.draft_revisions.pdf [file bmjopen-2019-030396.draft_revisions.pdf]

# BMJ Open

BMJ Open is committed to open peer review. As part of this commitment we make the peer review history of every article we publish publicly available.

When an article is published we post the peer reviewers' comments and the authors' responses online. We also post the versions of the paper that were used during peer review. These are the versions that the peer review comments apply to.

The versions of the paper that follow are the versions that were submitted during the peer review process. They are not the versions of record or the final published versions. They should not be cited or distributed as the published version of this manuscript.

BMJ Open is an open access journal and the full, final, typeset and author-corrected version of record of the manuscript is available on our site with no access controls, subscription charges or pay-per-view fees (<http://bmjopen.bmj.com>).

If you have any questions on BMJ Open's open peer review process please email [info.bmjopen@bmj.com](mailto:info.bmjopen@bmj.com)

# BMJ Open

## The UroLife study: A prospective cohort on dietary and lifestyle habits in relation to non-muscle-invasive bladder cancer prognosis and health-related quality of life

|                               |                                                                                                                                                                                                                                                                                                                                                                                                                                             |
|-------------------------------|---------------------------------------------------------------------------------------------------------------------------------------------------------------------------------------------------------------------------------------------------------------------------------------------------------------------------------------------------------------------------------------------------------------------------------------------|
| Journal:                      | <i>BMJ Open</i>                                                                                                                                                                                                                                                                                                                                                                                                                             |
| Manuscript ID                 | bmjopen-2019-030396                                                                                                                                                                                                                                                                                                                                                                                                                         |
| Article Type:                 | Protocol                                                                                                                                                                                                                                                                                                                                                                                                                                    |
| Date Submitted by the Author: | 12-Mar-2019                                                                                                                                                                                                                                                                                                                                                                                                                                 |
| Complete List of Authors:     | de Goeij, Liesbeth; Radboudumc, Department for Health Evidence Westhoff, Ellen; Radboudumc, Department for Health Evidence Witjes, JA; Radboudumc, Department of Urology Aben, Katja; Netherlands Comprehensive Cancer Organisation; Radboudumc, Department for Health Evidence Kampman, Ellen; Wageningen University Kiemeneij, B; Radboudumc, Department for Health Evidence Vrieling, Alina ; Radboudumc, Department for Health Evidence |
| Keywords:                     | Urological tumours < ONCOLOGY, EPIDEMIOLOGY, Protocols & guidelines < HEALTH SERVICES ADMINISTRATION & MANAGEMENT                                                                                                                                                                                                                                                                                                                           |
|                               |                                                                                                                                                                                                                                                                                                                                                                                                                                             |

SCHOLARONE™  
Manuscripts

1  
2  
3 1 **The UroLife study: A prospective cohort on dietary and lifestyle habits in relation to**  
4  
5 2 **non-muscle-invasive bladder cancer prognosis and health-related quality of life**  
6

7 3  
8  
9 4 Liesbeth de Goeij<sup>a</sup>, Ellen Westhoff<sup>a</sup>, Alfred J. Witjes<sup>b</sup>, Katja K.H. Aben<sup>a,c</sup>, Ellen Kampman<sup>d</sup>,  
10  
11 5 Lambertus A.L.M. Kiemeney<sup>a,b</sup>, Alina Vrieling<sup>a\*</sup>  
12  
13 6

14  
15 7 <sup>a</sup> Radboud university medical center, Radboud Institute for Health Sciences, Nijmegen, The  
16  
17 8 Netherlands

18  
19  
20 9 <sup>b</sup> Radboud University Nijmegen Medical Center, Department of Urology, Nijmegen, The  
21  
22 10 Netherlands

23  
24  
25 11 <sup>c</sup> Netherlands Comprehensive Cancer Organisation, Utrecht, The Netherlands

26  
27  
28 12 <sup>d</sup> Wageningen University, Division of Human Nutrition and Health, Wageningen, The  
29  
30 13 Netherlands

31  
32  
33 14  
34  
35  
36 15 **\*Corresponding author:** Dr. Alina Vrieling, Radboud university medical center, Department  
37  
38 16 for Health Evidence (Mailbox 133), P.O. Box 9101, 6500 HB Nijmegen, The Netherlands.  
39  
40 17 Tel: +31 24 3616944, Fax: +31 24 3613505, e-mail: Alina.Vrieling@radboudumc.nl  
41  
42

43 18

44  
45  
46 19 **Word count:** 2973  
47

48  
49 20  
50  
51  
52  
53  
54  
55  
56  
57  
58  
59  
60

1  
2  
3 **21 ABSTRACT**

4  
5 **22 Introduction:**

6  
7 **23** Patients with non-muscle-invasive bladder cancer (NMIBC) have a good survival but are at  
8  
9 **24** high risk for tumour recurrence and disease progression. It is important to identify lifestyle  
10  
11 **25** habits that may reduce the risk of recurrence and progression and improve health-related  
12  
13 **26** quality of life (HRQOL). This paper describes the rationale and design of the UroLife study.  
14  
15 **27** The main aim of this study is to evaluate whether dietary and other lifestyle habits are related  
16  
17 **28** to prognosis and HRQOL in patients with NMIBC.

18  
19  
20 **29 Methods and analysis:**

21  
22 **30** The UroLife study is a multi-centre prospective cohort study among more than 1,100 newly  
23  
24 **31** diagnosed patients with NMIBC recruited from 22 hospitals in the Netherlands. At six weeks  
25  
26 **32** and three, 15, and 51 months after diagnosis, participants fill out a general questionnaire,  
27  
28 **33** and questionnaires about their dietary habits, lifestyle, and HRQOL. At three, 15, and 51  
29  
30 **34** months after diagnosis, information about fluid intake and micturition is collected with a  
31  
32 **35** four-day diary. At three and 15 months after diagnosis, patients donate blood samples  
33  
34 **36** for DNA extraction and (dietary) biomarker analysis. Tumour samples are collected  
35  
36 **37** from all patients with T1 disease to assess molecular subtypes. Information about  
37  
38 **38** disease characteristics and therapy for the primary tumour and subsequent recurrences is  
39  
40 **39** collected from the medical records by the Netherlands Cancer Registry.

41  
42  
43 **40 Ethics and dissemination:**

44  
45 **41** The study protocol has been approved by the Committee for Human Research region  
46  
47 **42** Arnhem-Nijmegen (CMO 2013-494). Patients who agree to participate in the study provide  
48  
49 **43** written informed consent. The findings from our study will be disseminated through peer-  
50  
51 **44** reviewed scientific journals and presentations at (inter)national scientific meetings. Patients  
52  
53 **45** will be informed about the progress and results of this study through biannual newsletters  
54  
55 **46** and through the website of the study and of the bladder cancer patient association.

56  
57  
58 **47**

1  
2  
3 48 **Keywords:** bladder cancer, diet, lifestyle, biomarkers, recurrence, prognosis, quality of life,  
4  
5 49 cohort, study protocol  
6  
7

8 50  
9

10  
11 51 **STRENGTHS AND LIMITATIONS OF THIS STUDY**  
12

- 13 52 • Large multicenter prospective cohort study of NMIBC patients recruited shortly after  
14 diagnosis  
15 53  
16  
17 54 • Extensive dietary, lifestyle, medical, and HRQOL data at multiple time points after  
18 diagnosis  
19 55  
20  
21 56 • Availability of blood samples at 3 and 15 months after diagnosis, and formalin-fixed,  
22 paraffin-embedded tumour tissue  
23 57  
24  
25 58 • Limited power for subgroup analyses  
26  
27

28 59  
29  
30  
31  
32  
33  
34  
35  
36  
37  
38  
39  
40  
41  
42  
43  
44  
45  
46  
47  
48  
49  
50  
51  
52  
53  
54  
55  
56  
57  
58  
59  
60

## 60 INTRODUCTION

61 Urinary bladder cancer (UBC) is the sixth most common cancer in the male population  
62 worldwide and tenth if considering both genders.[1] Approximately 75% of patients is  
63 diagnosed with non-muscle-invasive (NMIBC, stages Ta, T1, and Tis) and 25% with muscle-  
64 invasive (MIBC, stages T2, T3, and T4) bladder cancer.[2] Patients with NMIBC have a good  
65 survival but are at high risk for tumour recurrence and disease progression.[3] They are  
66 therefore subjected to frequent follow-up by cystoscopy and treatment. This makes bladder  
67 cancer the most expensive cancer in terms of health care expenditures per patient per  
68 year.[4] The high recurrence rate may also impact health-related quality of life (HRQOL).[5]  
69 Lifestyle factors have been linked to the prognosis and quality of life in patients with several  
70 cancer types [6, 7] but evidence in patients with NMIBC is scarce. If we can identify dietary  
71 and lifestyle habits that are related to the risk of recurrence and progression and HRQOL in  
72 patients with NMIBC, optimal interventions can be developed to improve their prognosis and  
73 HRQOL.

74 The primary risk factor for bladder cancer is smoking, which accounts for 43% of bladder  
75 cancer cases in men and 26% in women in Europe.[8] Other important risk factors for  
76 bladder cancer are occupational exposures to carcinogens like aromatic amines and  
77 polycyclic aromatic hydrocarbons (PAHs), family history, and specific low penetrance  
78 germline genetic variants.[9] Recent meta-analyses suggest that excess body weight [10]  
79 and physical inactivity [11] may also increase bladder cancer risk. The World Cancer  
80 Research Fund/American Institute for Cancer Research (The WCRF/AICR) report found  
81 probable evidence that arsenic in drinking water increases the risk of bladder, and limited  
82 suggestive evidence that higher consumption of fruit and vegetables and of tea decreases  
83 the risk of bladder cancer.[12] For other dietary and lifestyle factors, this report concluded  
84 that data were of too low quality, inconsistent, or the number of studies were insufficient to  
85 draw conclusions.[12]

86 Available evidence about the role of lifestyle habits on prognosis in patients with NMIBC is  
87 restricted to smoking [13, 14] and excess body weight.[15] A systematic review [13] and

1  
2  
3 88 recent meta-analysis of 10 studies including a total of 6,307 patients with NMIBC [14] found  
4  
5 89 that current and former smokers at diagnosis had an approximately 25% increased risk of  
6  
7 90 recurrence compared to never smokers. Our recent meta-analysis [15] of three studies [16-  
8  
9 91 18] showed that overweight and obesity compared to normal weight at diagnosis were  
10  
11 92 associated with increased risk of recurrence but not progression in patients with NMIBC,  
12  
13 93 although power for progression was limited.[15] Smoking cessation and weight loss after  
14  
15 94 diagnosis in relation to clinical outcomes has hardly been investigated. Evidence for other  
16  
17 95 lifestyle habits, such as fluid intake and micturition, physical activity, and fruit and vegetable  
18  
19 96 consumption, is very limited or not available.[15] Also, most studies on lifestyle and NMIBC  
20  
21 97 prognosis included a heterogeneous study population with different tumour stages and  
22  
23 98 grades of bladder cancer. However, NMIBC prognosis is clearly different for these subgroups  
24  
25 99 [19] and may also differ by molecular subtype.[20, 21] Whether associations of lifestyle  
26  
27 100 habits with NMIBC prognosis are mediated and/or modified by tumour stage and by  
28  
29 101 molecular subtype has not yet been investigated.

30  
31  
32 102 Despite the high frequency of surveillance and repeated treatments, relatively little is known  
33  
34 103 about the HRQOL of patients with NMIBC,[22] and research with validated bladder cancer-  
35  
36 104 specific instruments is needed.[23] A systematic review of five studies on lifestyle and  
37  
38 105 HRQOL in bladder cancer patients found some evidence for a positive association between  
39  
40 106 physical activity and HRQOL, but insufficient evidence to draw any conclusions for  
41  
42 107 consumption of fruit and vegetables or smoking cessation.[24]

43  
44  
45 108 There is a clear need to obtain more insight in the relation between lifestyle habits (and habit  
46  
47 109 changes) and NMIBC outcomes and whether this relation is mediated and/or modified by  
48  
49 110 tumour stage and molecular subtype. This information is essential to develop personalized  
50  
51 111 evidence-based lifestyle advice for patients with NMIBC to improve their prognosis and  
52  
53 112 quality of life. This would enable patients to get some control over their own disease course.

54  
55  
56 113

## 114 **METHODS AND ANALYSIS**

115 The UroLife study (**U**rothelial cell cancer: **L**ifestyle, prognosis, and quality of **L**ife) is a  
116 prospective cohort study including patients with newly diagnosed NMIBC. The study has  
117 been designed to evaluate the association of dietary and lifestyle habits with risk of  
118 recurrence and progression and HRQOL. Patients are recruited in 22 hospitals in the East,  
119 South, and Central part of the Netherlands. Before the start of the study, permission was  
120 asked from all urologists of the participating hospitals to select and invite eligible patients  
121 from the Netherlands Cancer Registry (NCR), held by the Netherlands Comprehensive  
122 Cancer Organisation (IKNL). Once every 1 to 2 weeks, new patients are identified through  
123 IKNL using notification lists of the nationwide network and registry of histo- and  
124 cytopathology in the Netherlands (PALGA foundation). Approximately 4 weeks after  
125 diagnosis, patients are invited on behalf of their urologist to participate in this study. Patients  
126 who agree to participate provide a written informed consent.

### 128 **Patient population**

129 Eligible participants are Dutch speaking patients between 18 and 80 years old who are newly  
130 diagnosed with a histologically confirmed primary stage Ta, T1, and Tis NMIBC tumour and  
131 underwent a transurethral resection. Patients with a previous diagnosis of cancer in the past  
132 five years and those with a lymph node metastasis or distant metastasis are not eligible.

### 134 **Patient and public involvement**

135 Patients were not involved in the design, recruitment and conduct of the study.

### 137 **Data collection and management**

#### 138 *Questionnaires*

139 Participants are asked to complete self-administered web-based or paper-and-pencil-based  
140 questionnaires at six weeks (T6wk), three months (T3mo), 15 months (T15mo), and 51  
141 months (T51mo) after diagnosis (Figure 1, Table 1). Web-based questionnaires are collected



1  
2  
3 142 using the data collection tool of the Patient Reported Outcomes Following Initial treatment  
4  
5 143 and Long term Evaluation of Survivorship (PROFILES) registry.[25] Follow-up telephone  
6  
7 144 calls are made to non-responding participants and to respondents whose questionnaires  
8  
9 145 have missing items.

10  
11 146 The baseline questionnaire contains questions on demographics (age, sex, ethnicity,  
12  
13 147 education, living situation, occupation, marital status) and (family) history of cancer. All  
14  
15 148 questionnaires collect information about height, body weight, amount and frequency of  
16  
17 149 alcohol consumption during week- and weekend days, smoking habits, comorbidities and  
18  
19 150 the use of medication. Information on smoking habits is collected in detail, including age or  
20  
21 151 date of starting and stopping smoking, number of cigarettes smoked per day, duration of  
22  
23 152 smoking, and passive exposure to smoking. Information about habitual physical activity is  
24  
25 153 collected by using the previously validated Short QUestionnaire to ASsess Health-  
26  
27 154 enhancing physical activity (SQUASH),[26] which is fairly reliable and valid in an adult  
28  
29 155 population.[26-28] The SQUASH questionnaire assesses the average time, i.e. number of  
30  
31 156 days per week and hours and minutes per day, spent in commuting activities, leisure  
32  
33 157 time activities, household activities, and activities at work in a normal week in the past  
34  
35 158 month. At T3mo, T15mo, and T51mo, patients are also asked to measure and report their  
36  
37 159 waist and hip circumference.  
38  
39  
40

41 160  
42  
43 161 Habitual dietary intake is collected using a 163-item validated and reproducible self-  
44  
45 162 administered food frequency questionnaire that was developed by Wageningen  
46  
47 163 University.[29] The questionnaire contains questions about the frequency of consumption of  
48  
49 164 food products and the portion size during the previous year (T6wk) or the previous months  
50  
51 165 (T3mo, T15mo, and T51mo). Frequency and portion size of consumed food products are  
52  
53 166 multiplied to obtain their intake in grams per day. Nutrient intake is calculated using the  
54  
55 167 Dutch Food Composition Database (NEVO 2011).[30] Information about fluid intake and  
56  
57 168 micturition is collected with a four-day diary at T3mo, T15mo en T51mo.  
58  
59  
60

1  
2  
3 170 HRQOL is assessed at all four time points with the validated EORTC QLQ-C30 [31] and a 24-  
4  
5 171 item module for patients with NMIBC, i.e. the EORTC QLQ-NMIBC24.[32] The EORTC QLQ-  
6  
7 172 C30 contains five function scales (physical, role, cognitive, emotional and social functioning),  
8  
9 173 three symptom scales (fatigue, nausea, pain and vomiting) and six single items (dyspnea,  
10  
11 174 insomnia, loss of appetite, constipation, diarrhea, and financial impact), all scored from 1 (not  
12  
13 175 at all) to 4 (very much)) and a global health status scale with ranges from 1 (very poor) to 7  
14  
15 176 (excellent). The EORTC QLQ-NMIBC24 contains six scales (urinary symptoms, malaise, future  
16  
17 177 worries, bloating and flatulence, sexual function, and male sexual function) and five single  
18  
19 178 items (intravesical treatment issues, sexual intimacy, risk of contaminating partner, sexual  
20  
21 179 enjoyment, female sexual problems) scored from 1 (not at all) to 4 (very much). All scores will  
22  
23 180 be linearly transformed to a 0 to 100 scale.  
24  
25  
26 181

27  
28 182 Furthermore, at T3mo patients are asked to report whether they are aware of possible risk  
29  
30 183 factors for (bladder) cancer, received lifestyle advice from their physician, and what their  
31  
32 184 attitudes are towards physicians giving lifestyle advice.  
33  
34  
35  
36  
37  
38  
39  
40  
41  
42  
43  
44  
45  
46  
47  
48  
49  
50  
51  
52  
53  
54  
55  
56  
57  
58  
59  
60

185 **Table 1** Overview of data collection in UroLife at the four time points

| Included topics                                    | T6wk                                                                                                                                                                               | T3mo | T15mo | T51mo |   |
|----------------------------------------------------|------------------------------------------------------------------------------------------------------------------------------------------------------------------------------------|------|-------|-------|---|
| <b>Questionnaires</b>                              |                                                                                                                                                                                    |      |       |       |   |
| <i>Sociodemographic data</i>                       | Date of birth, gender, living situation, marital status, country of birth of participant, father, mother, race, highest level of education, working history, occupational exposure | X    |       |       |   |
| <i>Anthropometry</i>                               | Height at diagnosis, weight two years before diagnosis, weight at age 18 years, average weight during adult life                                                                   | X    |       |       |   |
|                                                    | Current body weight, waist and hip circumference                                                                                                                                   | X    | X     | X     | X |
| <i>Lifestyle</i>                                   | Current and past smoking behaviour, environmental smoke exposure                                                                                                                   | X    | X     | X     | X |
|                                                    | Short Questionnaire to Assess Health-enhancing physical activity [26]                                                                                                              | X    | X     | X     | X |
|                                                    | Frequency and amount of alcohol consumption during week and weekend days                                                                                                           | X    | X     | X     | X |
|                                                    | Changes in eating habits and reasons for/type of changes                                                                                                                           |      | X     | X     | X |
| <i>Medical history</i>                             | Previously diagnosed with cancer, family history of cancer                                                                                                                         | X    |       |       |   |
|                                                    | Comorbidities, medication use, dietary supplement use                                                                                                                              | X    | X     | X     | X |
| <i>Questions for females</i>                       | Menstruation, menopause, use of contraceptives, use of hormone replacement therapy                                                                                                 | X    | X     | X     | X |
|                                                    | Pregnancy                                                                                                                                                                          | X    |       |       |   |
| <i>Diet</i>                                        | 163- item Food Frequency Questionnaire                                                                                                                                             | X    | X     | X     | X |
| <i>HRQOL</i>                                       | EORTC QLQ-C30 [31] and EORTC QLQ-NMIBC24 [32]                                                                                                                                      | X    | X     | X     | X |
| <i>Awareness risk factors and lifestyle advice</i> | Awareness of cancer risk factors, received lifestyle advice, attitudes towards lifestyle advice                                                                                    |      | X     |       |   |
| <b>Four-day diary</b>                              |                                                                                                                                                                                    |      |       |       |   |
|                                                    | Frequency micturition, amount and type of fluid intake                                                                                                                             |      | X     | X     | X |
| <b>Blood</b>                                       |                                                                                                                                                                                    |      |       |       |   |
|                                                    | EDTA whole blood for DNA isolation                                                                                                                                                 |      | X     |       |   |
|                                                    | EDTA plasma, heparin plasma                                                                                                                                                        |      | X     | X     |   |
| <b>Tissue</b>                                      |                                                                                                                                                                                    |      |       |       |   |
|                                                    | Formalin-fixed paraffin-embedded tissue of the primary tumour                                                                                                                      | X    |       |       |   |
| <b>Clinical data</b>                               |                                                                                                                                                                                    |      |       |       |   |
|                                                    | Disease characteristics, therapy                                                                                                                                                   | X    | X     | X     | X |
|                                                    | Recurrence and progression                                                                                                                                                         |      |       | X     | X |

1  
2  
3 187 *Blood samples*  
4

5 188 Non-fasting blood samples are collected at T3mo and T15mo. At T3mo, 10 ml EDTA  
6  
7 189 whole blood (for DNA isolation), 10 ml EDTA plasma and 10 ml heparin plasma is  
8  
9 190 collected. At T15mo, 10 ml EDTA plasma and 10 ml heparin plasma is collected.  
10  
11 191 Heparin plasma tubes are wrapped in aluminum foil to protect them from light. All blood  
12  
13 192 samples are collected, processed and stored at -80°C locally in the participating  
14  
15 193 hospitals according to a standard protocol before transportation on dry ice to the  
16  
17 194 Radboud Biobank. The blood samples are stored in the Radboud Biobank at -80°C for  
18  
19 195 future analyses of genetic and other biomarkers. Analysis of heparin plasma levels of  
20  
21 196 nine biomarkers of fruit and vegetable consumption is planned. Concentration of six  
22  
23 197 carotenoids (i.e. alpha-carotene, beta-carotene, beta-cryptoxanthin, lutein, lycopene  
24  
25 198 and zeaxanthin), alpha-tocopherol, beta- and gamma-tocopherol and retinol were  
26  
27 199 measured by HPLC (Thermo Scientific Accela LC system; Thermo Fisher Scientific) and  
28  
29 200 analyzed by using ChromQuest 5.0, Version 3.2.1 software (Thermo Fisher Scientific).  
30  
31

32 201

33  
34 202 *Tumour samples*  
35

36 203 From patients diagnosed with T1 NMIBC, tumour specimens will be collected in two batches  
37  
38 204 in 2019 and 2021. Tumour blocks will be identified by using the PALGA foundation and  
39  
40 205 retrieved using the Dutch National Tissuebank Portal (DNTP) from the local pathology  
41  
42 206 laboratories. Pathology review will be performed and tissue microarrays will be constructed.  
43  
44 207 Molecular subtypes will be assessed by immunohistochemistry in 2021. As the development  
45  
46 208 of a molecular classification system for NMIBC is still in progress and no consensus system  
47  
48 209 is available yet,[33] we will use the most suitable evidence-based subtyping method that will  
49  
50 210 then be available.  
51

52 211

53  
54  
55 212 *Clinical data*  
56

57 213 For all patients with NMIBC, information about disease characteristics and therapy for the  
58  
59 214 initial tumour and subsequent recurrences is collected from the medical records by data

1  
2  
3 215 managers of the Netherlands Cancer Registry. Information about tumour characteristics  
4  
5 216 includes incidence date, clinical (cTNM) and post-surgical (pTNM) stage,[34] tumour grade,  
6  
7 217 concomitant carcinoma in situ, multifocality, number of tumours and histology. With respect  
8  
9 218 to therapy, information is collected on type of cystoscopy (white or blue light) and on  
10  
11 219 transurethral resection (TUR), i.e. date of TUR, presence of detrusor in the surgical  
12  
13 220 specimen, and presence of lymphovascular invasion. Furthermore, data on local treatment  
14  
15 221 (e.g., intravesical chemotherapy, BCG) with start and stop dates and, if applicable, on  
16  
17 222 cystectomy (e.g., date, type) are collected.  
18  
19

20 223  
21  
22 224 Data on clinical outcomes, i.e. recurrence and progression with dates of diagnosis, stage and  
23  
24 225 grade, is also collected.  
25  
26 226

## 27 28 227 **Power considerations & Data analysis**

29  
30 228 The association of lifestyle factors with risk of recurrence and progression will be evaluated  
31  
32 229 by estimating hazard ratios and 95% confidence intervals using Cox proportional hazards  
33  
34 230 regression analyses. All analyses will be adjusted for age, gender, tumour characteristics,  
35  
36 231 and other potential confounders. Analytical techniques for longitudinal data and multiple  
37  
38 232 outcomes will also be considered. Our power calculation is based on 1,100 patients who will  
39  
40 233 be followed for five years. For comparing the highest (n=275) vs. lowest quartile (n=275) of a  
41  
42 234 lifestyle factor (or vice versa), this study will be sufficiently powered (two-sided alpha=0.05,  
43  
44 235 power 80%) to detect a hazard ratio of  $\geq 1.5$  or  $\geq 1.3$  (or  $\leq 0.7$  or  $\leq 0.8$ ) when assuming a five-  
45  
46 236 year recurrence risk of 31% or 78%, [35] respectively. [36, 37] With an assumed loss to follow-  
47  
48 237 up of 25% after five years, detectable hazard ratios will increase to  $\geq 1.6$  or  $\geq 1.4$  (or  $\leq 0.6$  or  
49  
50 238  $\leq 0.7$ ), respectively. Lower hazard ratios can be detected when lifestyle factors are modeled  
51  
52 239 continuously.  
53

54  
55 240 The association of lifestyle factors with HRQOL will be evaluated using longitudinal mixed  
56  
57 241 model analyses, taking into account the within-subject variation in lifestyle and HRQOL over  
58  
59 242 time and the between-subject variation. All analyses will be adjusted for age, gender, tumour

1  
2  
3 243 characteristics, and other potential confounders. Since we expect that the between-subject  
4  
5 244 variation in lifestyle and HRQOL will be much larger than the within-subject variation, most  
6  
7 245 information will come from the association observed between subjects and not from the  
8  
9 246 association observed within subjects over time, Therefore, our power calculation is based on  
10  
11 247 a cross-sectional correlation at one time point. With 825 patients (assuming a drop-out of  
12  
13 248 25%) and using 10 predictor variables, we have 80% power to detect a small correlation  
14  
15 249 (Cohen's  $f^2$  of 0.02).[38, 39] Power will be higher when using repeated measurements over  
16  
17 250 time, especially when there is within-subject variation of lifestyle factors and HRQOL over  
18  
19 251 time.  
20  
21

22 252

### 23 24 253 **Cohort status**

25  
26 254 Medical ethical approval was obtained on 17 January 2014. Patient recruitment started in  
27  
28 255 May 2014. Between 8 May 2014 and 25 April 2017, 2,133 patients with NMIBC initially  
29  
30 256 diagnosed with Ta, T1, or Tis tumours have been identified and invited to participate in  
31  
32 257 UroLife. Of these invited patients, 1,193 patients agreed to participate and 77 dropped out  
33  
34 258 before filling out the first questionnaires (response rate 52%). Since May 2017, recruitment of  
35  
36 259 patients with T1 (but not Ta or Tis) tumours has continued and is still ongoing. We aim to  
37  
38 260 recruit a total of at least 700 patients with T1 bladder cancer, and the projected date of  
39  
40 261 recruitment completion is April 2021.  
41  
42

43 262

### 44 45 263 **DISCUSSION**

46  
47 264 The UroLife study is one of the largest multicenter prospective cohort studies on lifestyle and  
48  
49 265 NMIBC outcomes worldwide. UroLife will provide new and comprehensive insights into  
50  
51 266 whether lifestyle habits (or habit changes) are related to NMIBC outcomes and HRQOL, and  
52  
53 267 whether these relations differ by tumour stage and molecular subtype. Unique features of  
54  
55 268 UroLife are the recruitment of patients shortly after diagnosis, collection of extensive dietary,  
56  
57 269 lifestyle, medical, and HRQOL data at multiple time points after diagnosis, collection of blood  
58  
59  
60

1  
2  
3 270 (for DNA and biomarker analysis), and the availability of tumour tissue samples (for  
4  
5 271 molecular classification).  
6

7 272 As in many prospective cohort studies, non-participation and loss to follow may limit the  
8  
9 273 generalizability of our findings. Although our study is large, we intend to combine our dataset  
10  
11 274 in the future with other similar prospective studies in NMIBC to increase statistical power for  
12  
13 275 subgroup analyses. Our ultimate aim is to provide personalized evidence-based lifestyle  
14  
15 276 advice to patients with NMIBC, also according to tumour stage and molecular subtype, to  
16  
17 277 enable them to have an influence on their clinical outcome.  
18

19  
20 278

## 21 22 279 **ETHICS AND DISSEMINATION**

23  
24 280 The study protocol has been approved by the Committee for Human Research region  
25  
26 281 Arnhem-Nijmegen (CMO 2013-494). Patients who agree to participate in the study provide  
27  
28 282 written informed consent. The findings from our cohort study will be disseminated through  
29  
30 283 peer-reviewed scientific journals, and presentations at (inter)national scientific meetings.  
31  
32 284 Patients will be informed about the progress and results of this study through biannual  
33  
34 285 newsletters and through the website of the study (<https://www.radboudumc.nl/trials/urolife>)  
35  
36 286 and of the bladder cancer patient association (<https://www.blaasofnierkanker.nl/>). Also,  
37  
38 287 presentations will be given at contact days of the bladder cancer patient association.  
39  
40  
41  
42  
43  
44  
45  
46  
47  
48  
49  
50  
51  
52  
53  
54  
55  
56  
57  
58  
59  
60

1  
2  
3 288 **DECLARATIONS**  
4

5 289

6  
7 290 **Authors' contributions**  
8

9 291 AV, LALMK, AJW, EK, and KKHA contributed to the conception and design of the study. AV  
10  
11 292 provides overall study management and coordinates the project. EW has contributed and  
12  
13 293 LdG contributes to data collection. LdG, EW and AV drafted the manuscript. All authors have  
14  
15 294 critically read and revised the manuscript. All authors approved the final version of the  
16  
17 295 manuscript.  
18

19  
20 296

21  
22 297 **Funding**  
23

24 298 This work was supported by Alpe d'HuZes/Dutch Cancer Society (KUN 2013-5926) and  
25  
26 299 Dutch Cancer Society (Project no. 11179). Sponsors were not involved in the study design  
27  
28 300 nor will they be in the collection, analysis, and interpretation of data, or in the publications  
29  
30 301 that will result from this study.  
31

32 302

33  
34 303 **Competing interests**  
35

36 304 The authors declare that they have no competing interests.  
37  
38 305

39  
40  
41 306 **Availability of data and material**  
42

43 307 Data and material are not yet available since enrollment to the study is still ongoing and data  
44  
45 308 collection has not been completed yet. After completion of data collection, data will be made  
46  
47 309 available by the corresponding author upon reasonable request.  
48

49 310

50  
51 311 **Acknowledgements**  
52

53 312 We are grateful to all the patients who participate in this study and we would like to thank the  
54  
55 313 following hospitals for their involvement in recruitment for the UroLife study: Amphia  
56  
57 314 Ziekenhuis, Breda/Oosterhout (Drs. D.K.E. van der Schoot); Ziekenhuis Bernhoven, Uden  
58  
59 315 (Drs. A.Q.H.J. Niemer); Canisius-Wilhelmina Ziekenhuis, Nijmegen (Dr. D.M. Somford);  
60



1  
2  
3 316 Catharina Ziekenhuis, Eindhoven (Dr. E.L. Koldewijn); Deventer Ziekenhuis, Deventer (Drs.  
4  
5 317 P.L.M. van den Tillaar); Elkerliek Ziekenhuis, Helmond (Drs. E.W. Stapper †, Drs. P.J. van  
6  
7 318 Hest); Gelre Ziekenhuizen, Apeldoorn/Zutphen (Drs. D.M. Bochove-Overgaauw); Isala  
8  
9 319 Klinieken, Zwolle (Dr. E. te Slaa); Jeroen Bosch Ziekenhuis, 's-Hertogenbosch (Dr. J.R.  
10  
11 320 Oddens; Dr. S. van der Meer); Meander Medisch Centrum, Amersfoort (Drs. F.S. van Rey);  
12  
13 321 Medisch Spectrum Twente, Enschede (Dr. M. Asselman); Maxima Medisch Centrum,  
14  
15 322 Veldhoven/Eindhoven (Dr. L.M.C.L. Fossion); Maasziekenhuis Pantein, Boxmeer (Drs. E.  
16  
17 323 van Boven); Radboudumc, Nijmegen (Prof. Dr. J.A. Witjes); Rijnstate,  
18  
19 324 Arnhem/Velp/Zevenaar (Drs. C.J. Wijburg); Slingeland Ziekenhuis, Doetinchem (Drs. A.D.H.  
20  
21 325 Geboers); St. Anna Ziekenhuis, Geldrop (Drs. A. Sonneveld); Elisabeth-TweeSteden  
22  
23 326 Ziekenhuis, Tilburg/Waalwijk (Dr. P.J.M. Kil); St. Jansdal Ziekenhuis, Harderwijk (Drs. W.J.  
24  
25 327 Kniestedt); VieCuri, Venlo (Drs. G. Yurdakul, Dr. A.H.P. Meier); Ziekenhuis Gelderse Vallei,  
26  
27 328 Ede (Drs. M.D.H. Kortleve); Ziekenhuisgroep Twente, Almelo/Hengelo (Dr. E.B. Cornel). In  
28  
29 329 addition, we thank Ms. Monique Eijgenberger for her assistance in data collection. We also  
30  
31 330 thank the data managers and research assistants of the Netherlands Cancer Registry held  
32  
33 331 by the Netherlands Comprehensive Cancer Organisation (IKNL) for inviting patients and  
34  
35 332 collecting the clinical data.  
36  
37  
38  
39  
40  
41  
42  
43  
44  
45  
46  
47  
48  
49  
50  
51  
52  
53  
54  
55  
56  
57  
58  
59  
60

## 334 REFERENCES

1. Bray F, Ferlay J, Soerjomataram I, et al. Global cancer statistics 2018: GLOBOCAN estimates of incidence and mortality worldwide for 36 cancers in 185 countries. *CA Cancer J Clin* 2018;68(6):394-424.
2. Babjuk M, Böhle A, Burger M, et al. EAU guidelines on non-muscle-invasive urothelial carcinoma of the bladder: update 2016. *Eur Urol* 2017;71(3):447-61.
3. Cambier S, Sylvester RJ, Collette L, et al. EORTC Nomograms and Risk Groups for Predicting Recurrence, Progression, and Disease-specific and Overall Survival in Non-Muscle-invasive Stage Ta-T1 Urothelial Bladder Cancer Patients Treated with 1-3 Years of Maintenance Bacillus Calmette-Guerin. *Eur Urol* 2016;69(1):60-9.
4. Sievert KD, Amend B, Nagele U, et al. Economic aspects of bladder cancer: what are the benefits and costs? *World J Urol* 2009;27(3):295-300.
5. Schmidt S, Francés A, Garin JAL, et al. Quality of life in patients with non-muscle-invasive bladder cancer: One-year results of a multicentre prospective cohort study. *Urol Oncol* 2015;33(1):19.e7-19.e15.
6. Ligibel J. Lifestyle factors in cancer survivorship. *J Clin Oncol* 2012;30(30):3697-704.
7. Mehra K, Berkowitz A, Sanft T. Diet, Physical Activity, and Body Weight in Cancer Survivorship. *Med Clin North Am.* 2017;101(6):1151-65.
8. van Osch FH, Jochems SH, van Schooten F-J, et al. Quantified relations between exposure to tobacco smoking and bladder cancer risk: a meta-analysis of 89 observational studies. *Int J Epidemiol* 2016;45(3):857-70.
9. Cumberbatch MGK, Jubber I, Black PC, et al. Epidemiology of Bladder Cancer: A Systematic Review and Contemporary Update of Risk Factors in 2018. *Eur Urol* 2018;74(6):784-95.
10. Sun J-W, Zhao L-G, Yang Y, et al. Obesity and risk of bladder cancer: a dose-response meta-analysis of 15 cohort studies. *PloS one* 2015;10(3):e0119313.
11. Keimling M, Behrens G, Schmid D, et al. The association between physical activity and bladder cancer: systematic review and meta-analysis. *Br J Cancer* 2014;110(7):1862-70.
12. World Cancer Research Fund/American Institute for Cancer Research. Continuous Update Project Expert Report 2018: Diet, nutrition, physical activity and bladder cancer. 2018, <https://www.wcrf.org/dietandcancer>
13. Crivelli JJ, Xylinas E, Kluth LA, et al. Effect of smoking on outcomes of urothelial carcinoma: a systematic review of the literature. *Eur Urol* 2014;65(4):742-54.
14. Hou L, Hong X, Dai M, et al. Association of smoking status with prognosis in bladder cancer: A meta-analysis. *Oncotarget* 2017;8(1):1278-89.
15. Westhoff E, Witjes JA, Fleshner NE, et al. Body Mass Index, Diet-Related Factors, and Bladder Cancer Prognosis: A Systematic Review and Meta-Analysis. *Bladder Cancer* 2018;4(1):91-112.

1  
2  
3  
4  
5  
6  
7  
8  
9  
10  
11  
12  
13  
14  
15  
16  
17  
18  
19  
20  
21  
22  
23  
24  
25  
26  
27  
28  
29  
30  
31  
32  
33  
34  
35  
36  
37  
38  
39  
40  
41  
42  
43  
44  
45  
46  
47  
48  
49  
50  
51  
52  
53  
54  
55  
56  
57  
58  
59  
60

388

389

390

391

392

393

394

395

396

397

398

399

400

401

402

403

404

405

406

407

408

409

410

411

412

413

414

415

416

417

418

419

420

421

422

423

424

425

426

427

428

429

430

431

432

433

434

435

436

437

438

439

440

441

16. Kluth LA, Xylinas E, Crivelli JJ, et al. Obesity is associated with worse outcomes in patients with T1 high grade urothelial carcinoma of the bladder. *J Urol* 2013;190(2):480-6.
17. Wyszynski A, Tanyos SA, Rees JR, et al. Body mass and smoking are modifiable risk factors for recurrent bladder cancer. *Cancer* 2014;120(3):408-14.
18. Xu T, Zhu Z, Wang X, et al. Impact of body mass on recurrence and progression in Chinese patients with Ta, T1 urothelial bladder cancer. *Int Urol Nephrol* 2015;47(7):1135-41.
19. van der Heijden AG, Witjes JA. Recurrence, progression, and follow-up in non-muscle-invasive bladder cancer. *Eur Urol Suppl* 2009;8(7):556-62.
20. Sjö Dahl G, Lauss M, Lövgren K, et al. A molecular taxonomy for urothelial carcinoma. *Clin Cancer Res* 2012;18:3377-86.
21. Patschan O, Sjö Dahl G, Chebil G, et al. A molecular pathologic framework for risk stratification of stage T1 urothelial carcinoma. *Eur Urol* 2015;68(5):824-32.
22. Jung A, Nielsen ME, Crandell JL, et al. Quality of Life in Non-Muscle-Invasive Bladder Cancer Survivors: A Systematic Review. *Cancer Nurs* Published Online First: 1 June 2018. doi:10.1097/NCC.0000000000000606.
23. Mohamed N, Gilbert F, Lee C, et al. Pursuing Quality in the application of bladder Cancer quality of Life Research. *Bladder Cancer* 2016;2(2):139-49.
24. Gopalakrishna A, Longo TA, Fantony JJ, et al. Lifestyle factors and health-related quality of life in bladder cancer survivors: a systematic review. *J Cancer Surviv* 2016;10(5):874-82.
25. van de Poll-Franse LV, Horevoorts N, van Eenbergen M, et al. The Patient Reported Outcomes Following Initial treatment and Long term Evaluation of Survivorship registry: scope, rationale and design of an infrastructure for the study of physical and psychosocial outcomes in cancer survivorship cohorts. *Eur J Cancer* 2011;47(14):2188-94.
26. Wendel-Vos GW, Schuit AJ, Saris WH, et al. Reproducibility and relative validity of the short questionnaire to assess health-enhancing physical activity. *J Clin Epidemiol* 2003;56(12):1163-9.
27. de Hollander EL, Zwart L, de Vries SI, et al. The SQUASH was a more valid tool than the OBiN for categorizing adults according to the Dutch physical activity and the combined guideline. *J Clin Epidemiol* 2012;65(1):73-81.
28. Wagenmakers R, van den Akker-Scheek I, Groothoff JW, et al. Reliability and validity of the short questionnaire to assess health-enhancing physical activity (SQUASH) in patients after total hip arthroplasty. *BMC Musculoskelet Disord* 2008;9(1):141.
29. Siebelink E, Geelen A, de Vries JH. Self-reported energy intake by FFQ compared with actual energy intake to maintain body weight in 516 adults. *Br J Nutr* 2011;106(2):274-81.

- 1  
2  
3 442 30. NEVO-tabel (2011) Dutch Food Composition Database. Den Haag:  
4 443 RIVM/Voedingscentrum.  
5 444  
6 445 31. Aaronson NK, Ahmedzai S, Bergman B, et al. The European Organization for  
7 446 Research and Treatment of Cancer QLQ-C30: a quality-of-life instrument for use in  
8 447 international clinical trials in oncology. *J Natl Cancer Inst* 1993;85(5):365-76.  
9 448  
10 449 32. Blazeby JM, Hall E, Aaronson NK, et al. Validation and reliability testing of the  
11 450 EORTC QLQ-NMIBC24 questionnaire module to assess patient-reported outcomes in  
12 451 non-muscle-invasive bladder cancer. *Eur Urol* 2014;66(6):1148-56.  
13 452  
14 453 33. Chandrasekar T, Erlich A, Zlotta AR. Molecular Characterization of Bladder Cancer.  
15 454 *Curr Urol Rep* 2018;19(12):107.  
16 455  
17 456 34. Babjuk M, Böhle A, Burger M, et al. EAU Guidelines on Non-Muscle-Invasive  
18 457 Urothelial Carcinoma of the Bladder: Update 2016. *Eur Urol* 2017;71(3):447-61.  
19 458  
20 459 35. Sylvester RJ, van der Meijden AP, Oosterlinck W, et al. Predicting recurrence and  
21 460 progression in individual patients with stage Ta T1 bladder cancer using EORTC risk  
22 461 tables: a combined analysis of 2596 patients from seven EORTC trials. *Eur Urol*  
23 462 2006;49(3):466-77.  
24 463  
25 464 36. Dupont WD, Plummer WD. Power and sample size calculations: a review and  
26 465 computer program. *Control Clin Trials* 1990;11(2):116-28.  
27 466  
28 467 37. Dupont WD, Plummer WD. PS: Power and Sample Size Calculation.  
29 468 <http://biostat.mc.vanderbilt.edu/wiki/Main/PowerSampleSize>. Accessed 16 January  
30 469 2019.  
31 470  
32 471 38. Faul F, Erdfelder E, Buchner A, et al. Statistical power analyses using G\* Power 3.1:  
33 472 Tests for correlation and regression analyses. *Behav Res Methods* 2009;41(4):1149-  
34 473 60.  
35 474  
36 475 39. Faul F, Erdfelder E, Buchner A, et al. G\*Power: Statistical Power Analyses for  
37 476 Windows and Mac. <http://www.gpower.hhu.de>. Accessed 16 January 2019.  
38  
39  
40  
41 477  
42  
43 478  
44  
45  
46  
47  
48  
49  
50  
51  
52  
53  
54  
55  
56  
57  
58  
59  
60

1  
2  
3  
4  
5  
6  
7  
8  
9  
10  
11  
12  
13  
14  
15  
16  
17  
18  
19  
20  
21  
22  
23  
24  
25  
26  
27  
28  
29  
30  
31  
32  
33  
34  
35  
36  
37  
38  
39  
40  
41  
42  
43  
44  
45  
46  
47  
48  
49  
50  
51  
52  
53  
54  
55  
56  
57  
58  
59  
60

479 **FIGURE LEGENDS**

480 **Figure 1** Timeline and study design of the UroLife study.

For peer review only

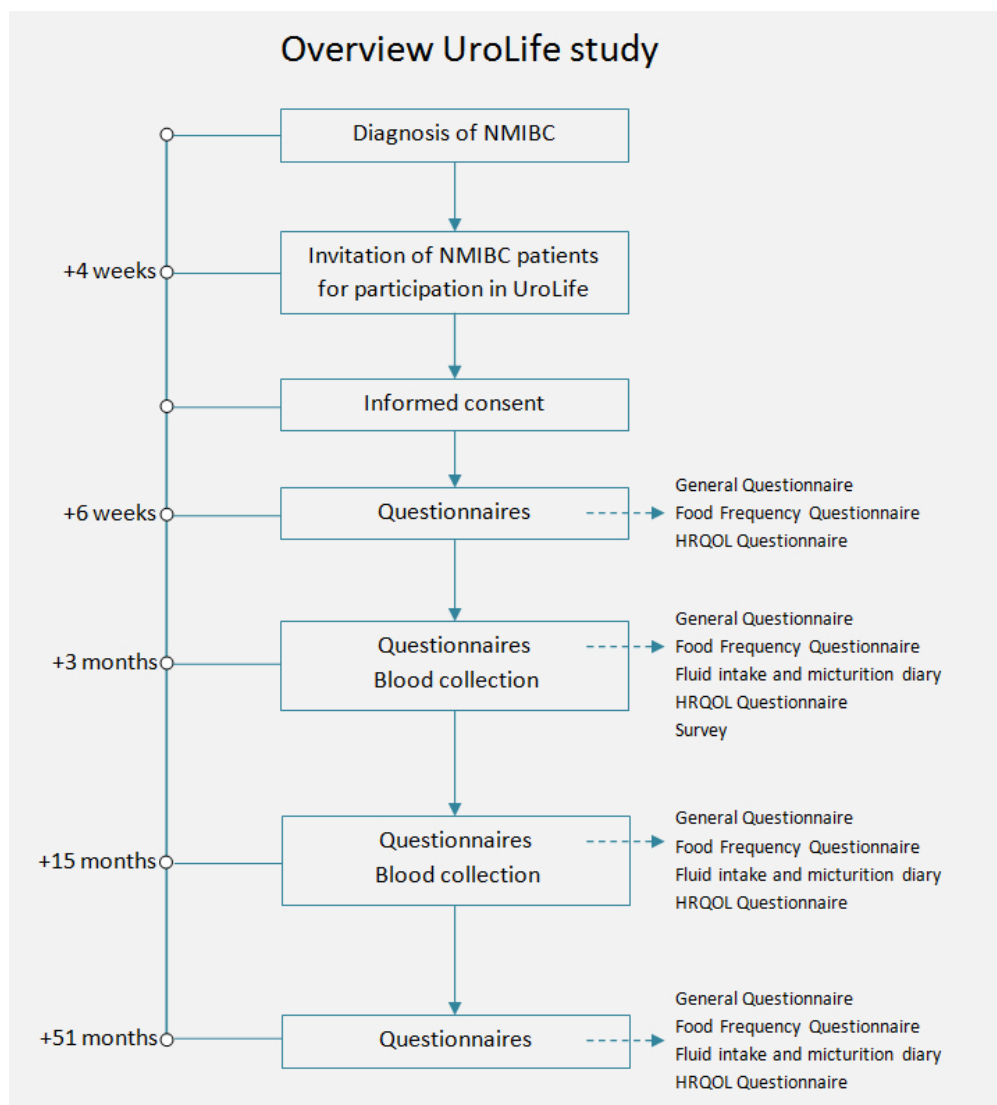

Figure 1 Timeline and study design of the UroLife study.

# BMJ Open

## The UroLife study: Protocol for a Dutch prospective cohort on lifestyle habits in relation to non-muscle-invasive bladder cancer prognosis and health-related quality of life

|                                 |                                                                                                                                                                                                                                                                                                                                                                                                                                                   |
|---------------------------------|---------------------------------------------------------------------------------------------------------------------------------------------------------------------------------------------------------------------------------------------------------------------------------------------------------------------------------------------------------------------------------------------------------------------------------------------------|
| Journal:                        | <i>BMJ Open</i>                                                                                                                                                                                                                                                                                                                                                                                                                                   |
| Manuscript ID                   | bmjopen-2019-030396.R1                                                                                                                                                                                                                                                                                                                                                                                                                            |
| Article Type:                   | Protocol                                                                                                                                                                                                                                                                                                                                                                                                                                          |
| Date Submitted by the Author:   | 27-Aug-2019                                                                                                                                                                                                                                                                                                                                                                                                                                       |
| Complete List of Authors:       | de Goeij, Liesbeth; Radboudumc, Department for Health Evidence Westhoff, Ellen; Radboudumc, Department for Health Evidence Witjes, JA; Radboudumc, Department of Urology Aben, Katja; Netherlands Comprehensive Cancer Organisation; Radboudumc, Department for Health Evidence Kampman, Ellen; Wageningen University Kiemeney, Lambertus; Radboudumc, Department for Health Evidence Vrieling, Alina; Radboudumc, Department for Health Evidence |
| <b>Primary Subject Heading</b>: | Urology                                                                                                                                                                                                                                                                                                                                                                                                                                           |
| Secondary Subject Heading:      | Epidemiology                                                                                                                                                                                                                                                                                                                                                                                                                                      |
| Keywords:                       | Urological tumours < ONCOLOGY, EPIDEMIOLOGY, NUTRITION & DIETETICS                                                                                                                                                                                                                                                                                                                                                                                |
|                                 |                                                                                                                                                                                                                                                                                                                                                                                                                                                   |

SCHOLARONE™  
Manuscripts

1  
2  
3 1 **The UroLife study: Protocol for a Dutch prospective cohort on lifestyle habits in**  
4  
5 2 **relation to non-muscle-invasive bladder cancer prognosis and health-related quality of**  
6  
7 3 **life**  
8

9 4  
10  
11 5 Liesbeth de Goeij<sup>a</sup>, Ellen Westhoff<sup>a</sup>, J. Alfred Witjes<sup>b</sup>, Katja K.H. Aben<sup>a,c</sup>, Ellen Kampman<sup>d</sup>,  
12  
13 6 Lambertus A.L.M. Kiemeney<sup>a,b</sup>, Alina Vrieling<sup>a\*</sup>  
14

15 7  
16  
17  
18 8 <sup>a</sup> Radboud university medical center, Radboud Institute for Health Sciences, Nijmegen, The  
19  
20 9 Netherlands

21  
22  
23 10 <sup>b</sup> Radboud University Nijmegen Medical Center, Department of Urology, Nijmegen, The  
24  
25 11 Netherlands

26  
27  
28 12 <sup>c</sup> Netherlands Comprehensive Cancer Organisation, Utrecht, The Netherlands

29  
30  
31 13 <sup>d</sup> Wageningen University, Division of Human Nutrition and Health, Wageningen, The  
32  
33 14 Netherlands

34  
35  
36 15  
37  
38  
39 16 **\*Corresponding author:** Dr. Alina Vrieling, Radboud university medical center, Department  
40  
41 17 for Health Evidence (Mailbox 133), P.O. Box 9101, 6500 HB Nijmegen, The Netherlands.  
42  
43 18 Tel: +31 24 3616944, Fax: +31 24 3613505, e-mail: Alina.Vrieling@radboudumc.nl  
44

45 19

46  
47  
48 20 **Word count:** 3040

49  
50  
51 21  
52  
53  
54  
55  
56  
57  
58  
59  
60



## 22 **ABSTRACT**

### 23 **Introduction:**

24 Patients with non-muscle-invasive bladder cancer (NMIBC) have a good survival but are at  
25 high risk for tumour recurrence and disease progression. It is important to identify lifestyle  
26 habits that may reduce the risk of recurrence and progression and improve health-related  
27 quality of life (HRQOL). This paper describes the rationale and design of the UroLife study.  
28 The main aim of this study is to evaluate whether lifestyle habits are related to prognosis and  
29 HRQOL in patients with NMIBC.

### 30 **Methods and analysis:**

31 The UroLife study is a multi-centre prospective cohort study among more than 1,100 newly  
32 diagnosed patients with NMIBC recruited from 22 hospitals in the Netherlands. At six weeks  
33 and three, 15, and 51 months after diagnosis, participants fill out a general questionnaire,  
34 and questionnaires about their lifestyle habits and HRQOL. At three, 15, and 51 months after  
35 diagnosis, information about fluid intake and micturition is collected with a four-day  
36 diary. At three and 15 months after diagnosis, patients donate blood samples for DNA  
37 extraction and (dietary) biomarker analysis. Tumour samples are collected from all  
38 patients with T1 disease to assess molecular subtypes. Information about disease  
39 characteristics and therapy for the primary tumour and subsequent recurrences is collected  
40 from the medical records by the Netherlands Cancer Registry. Statistical analyses will be  
41 adjusted for age, gender, tumour characteristics and other known confounders.

### 42 **Ethics and dissemination:**

43 The study protocol has been approved by the Committee for Human Research region  
44 Arnhem-Nijmegen (CMO 2013-494). Patients who agree to participate in the study provide  
45 written informed consent. The findings from our study will be disseminated through peer-  
46 reviewed scientific journals and presentations at (inter)national scientific meetings. Patients  
47 will be informed about the progress and results of this study through biannual newsletters  
48 and through the website of the study and of the bladder cancer patient association.

49

1  
2  
3 50 **Keywords:** bladder cancer, diet, lifestyle, biomarkers, recurrence, prognosis, quality of life,  
4  
5 51 cohort, study protocol  
6  
7

8 52  
9

10  
11 53 **STRENGTHS AND LIMITATIONS OF THIS STUDY**  
12

- 13 54 • Large multicenter prospective cohort study of NMIBC patients recruited shortly after  
14 diagnosis  
15 55  
16  
17 56 • Extensive dietary, lifestyle, medical, and HRQOL data at multiple time points after  
18 diagnosis  
19 57  
20  
21 58 • Availability of blood samples at 3 and 15 months after diagnosis, and formalin-fixed,  
22 paraffin-embedded tumour tissue  
23 59  
24  
25  
26 60 • Limited power for subgroup analyses  
27  
28 61 • Loss to follow-up potentially influencing validity of results  
29  
30  
31  
32  
33  
34  
35  
36  
37  
38  
39  
40  
41  
42  
43  
44  
45  
46  
47  
48  
49  
50  
51  
52  
53  
54  
55  
56  
57  
58  
59  
60

## 63 INTRODUCTION

64 Urinary bladder cancer is the sixth most common cancer in the male population worldwide  
65 and tenth if considering both genders.[1] Approximately 75% of patients is diagnosed with  
66 non-muscle-invasive (NMIBC, stages Ta, T1, and Tis) and 25% with muscle-invasive (MIBC,  
67 stages T2, T3, and T4) bladder cancer.[2] Patients with NMIBC have a good survival but are  
68 at high risk for tumour recurrence and disease progression.[3] They are therefore subjected  
69 to frequent follow-up by cystoscopy and treatment. This makes bladder cancer the most  
70 expensive cancer in terms of health care expenditures per patient per year.[4] The high  
71 recurrence rate may also impact health-related quality of life (HRQOL).[5] Lifestyle factors  
72 have been linked to the prognosis and quality of life in patients with several cancer types [6,  
73 7] but evidence in patients with NMIBC is scarce. If we can identify lifestyle habits that are  
74 related to the risk of recurrence and progression and HRQOL in patients with NMIBC,  
75 optimal interventions can be developed to improve their prognosis and HRQOL.

76 The primary risk factor for bladder cancer is smoking, which accounts for 43% of bladder  
77 cancer cases in men and 26% in women in Europe.[8] Other important risk factors for  
78 bladder cancer are occupational exposures to carcinogens like aromatic amines and  
79 polycyclic aromatic hydrocarbons (PAHs), family history, and specific low penetrance  
80 germline genetic variants.[9] Recent meta-analyses suggest that excess body weight [10]  
81 and physical inactivity [11] may also increase bladder cancer risk. The World Cancer  
82 Research Fund/American Institute for Cancer Research (The WCRF/AICR) report found  
83 probable evidence that arsenic in drinking water increases the risk of bladder, and limited  
84 suggestive evidence that higher consumption of fruit and vegetables and of tea decreases  
85 the risk of bladder cancer.[12] For other dietary and lifestyle factors, this report concluded  
86 that data were of too low quality, inconsistent, or the number of studies were insufficient to  
87 draw conclusions.[12]

88 Available evidence about the role of lifestyle habits on prognosis in patients with NMIBC is  
89 restricted to smoking [13, 14] and excess body weight.[15] A systematic review [13] and  
90 recent meta-analysis of 10 studies including a total of 6,307 patients with NMIBC [14] found

1  
2  
3 91 that current and former smokers at diagnosis had an approximately 25% increased risk of  
4  
5 92 recurrence compared to never smokers. Our recent meta-analysis [15] of three studies [16-  
6  
7 93 18] showed that overweight and obesity compared to normal weight at diagnosis were  
8  
9 94 associated with increased risk of recurrence but not progression in patients with NMIBC,  
10  
11 95 although power for progression was limited.[15] Smoking cessation and weight loss after  
12  
13 96 diagnosis in relation to clinical outcomes has hardly been investigated. Evidence for other  
14  
15 97 lifestyle habits, such as fluid intake and micturition, physical activity, and fruit and vegetable  
16  
17 98 consumption, is very limited or not available.[15] Also, most studies on lifestyle and NMIBC  
18  
19 99 prognosis included a heterogeneous study population with different tumour stages and  
20  
21 100 grades of bladder cancer. However, NMIBC prognosis is clearly different for these subgroups  
22  
23 101 [19] and may also differ by molecular subtype.[20, 21] Whether associations of lifestyle  
24  
25 102 habits with NMIBC prognosis are mediated and/or modified by tumour stage and by  
26  
27 103 molecular subtype has not yet been investigated.

28  
29 104 Despite the high frequency of surveillance and repeated treatments, relatively little is known  
30  
31 105 about the HRQOL of patients with NMIBC,[22] and research with validated bladder cancer-  
32  
33 106 specific instruments is needed.[23] A systematic review of five studies on lifestyle and  
34  
35 107 HRQOL in bladder cancer patients found some evidence for a positive association between  
36  
37 108 physical activity and HRQOL, but insufficient evidence to draw any conclusions for  
38  
39 109 consumption of fruit and vegetables or smoking cessation.[24]

40  
41 110 The aim of our study is to evaluate the association of pre- and post-diagnosis lifestyle habits  
42  
43 111 (and habit changes) with risk of recurrence and progression and HRQOL. Also, we want to  
44  
45 112 explore whether this association is mediated and/or modified by tumour stage and molecular  
46  
47 113 subtype.

48  
49  
50  
51 114  
52  
53  
54  
55  
56  
57  
58  
59  
60

## 115 **METHODS AND ANALYSIS**

116 The UroLife study (**U**rothelial cell cancer: **L**ifestyle, prognosis, and quality of **L**ife) is a  
117 prospective cohort study including patients with newly diagnosed NMIBC. The study has  
118 been designed to evaluate the association of lifestyle habits with risk of recurrence and  
119 progression and HRQOL. Patients are recruited in 22 hospitals in the East, South, and  
120 Central part of the Netherlands. Before the start of the study, permission was asked from all  
121 urologists of the participating hospitals to select and invite eligible patients from the  
122 Netherlands Cancer Registry (NCR), held by the Netherlands Comprehensive Cancer  
123 Organisation (IKNL). Once every 1 to 2 weeks, new patients are identified through IKNL  
124 using notification lists of the nationwide network and registry of histo- and cytopathology in  
125 the Netherlands (PALGA foundation). Approximately 4 weeks after diagnosis, patients are  
126 invited on behalf of their urologist to participate in this study. Patients who agree to  
127 participate provide a written informed consent.

### 129 **Patient population**

130 Eligible participants are Dutch speaking patients between 18 and 80 years old who are newly  
131 diagnosed with a histologically confirmed primary stage Ta, T1, and Tis NMIBC tumour and  
132 underwent a transurethral resection. Patients with a previous diagnosis of cancer in the past  
133 five years and those with a lymph node metastasis or distant metastasis are not eligible.

### 135 **Patient and public involvement**

136 Patients were not involved in the design, recruitment and conduct of the study.

### 138 **Data collection and management**

#### 139 *Questionnaires*

140 Participants are asked to complete self-administered web-based or paper-and-pencil-based  
141 questionnaires at six weeks (T6wk), three months (T3mo), 15 months (T15mo), and 51  
142 months (T51mo) after diagnosis (Figure 1, Table 1). Web-based questionnaires are collected

1  
2  
3 143 using the data collection tool of the Patient Reported Outcomes Following Initial treatment  
4  
5 144 and Long term Evaluation of Survivorship (PROFILES) registry.[25] Follow-up telephone  
6  
7 145 calls are made to non-responding participants and to respondents whose questionnaires  
8  
9 146 have missing items.

10  
11 147 The baseline questionnaire contains questions on demographics (age, sex, ethnicity,  
12  
13 148 education, living situation, occupation, marital status) and (family) history of cancer. All  
14  
15 149 questionnaires collect information about height, body weight, amount and frequency of  
16  
17 150 alcohol consumption during week- and weekend days, smoking habits, comorbidities and  
18  
19 151 the use of medication. Information on smoking habits is collected in detail, including age or  
20  
21 152 date of starting and stopping smoking, number of cigarettes smoked per day, duration of  
22  
23 153 smoking, and passive exposure to smoking. Information about habitual physical activity is  
24  
25 154 collected by using the previously validated Short QUestionnaire to ASsess Health-  
26  
27 155 enhancing physical activity (SQUASH),[26] which is fairly reliable and valid in an adult  
28  
29 156 population.[26-28] The SQUASH questionnaire assesses the average time, i.e. number of  
30  
31 157 days per week and hours and minutes per day, spent in commuting activities, leisure  
32  
33 158 time activities, household activities, and activities at work in a normal week in the past  
34  
35 159 month. At T3mo, T15mo, and T51mo, patients are also asked to measure and report their  
36  
37 160 waist and hip circumference.

38  
39 161  
40  
41 162 Habitual dietary intake is collected using a 163-item validated and reproducible self-  
42  
43 163 administered food frequency questionnaire that was developed by Wageningen  
44  
45 164 University.[29] The questionnaire contains questions about the frequency of consumption of  
46  
47 165 food products and the portion size during the previous year (T6wk) or the previous months  
48  
49 166 (T3mo, T15mo, and T51mo). Frequency and portion size of consumed food products are  
50  
51 167 multiplied to obtain their intake in grams per day. Nutrient intake is calculated using the  
52  
53 168 Dutch Food Composition Database (NEVO 2011).[30] Information about fluid intake and  
54  
55 169 micturition is collected with a four-day diary at T3mo, T15mo en T51mo.

56  
57  
58  
59  
60 170

1  
2  
3 171 HRQOL is assessed at all four time points with the validated European Organisation for  
4  
5 172 Research and Treatment of Cancer (EORTC) QLQ-C30 [31] and a 24-item module for patients  
6  
7 173 with NMIBC, i.e. the EORTC QLQ-NMIBC24.[32] The EORTC QLQ-C30 contains five function  
8  
9 174 scales (physical, role, cognitive, emotional and social functioning), three symptom scales  
10  
11 175 (fatigue, nausea, pain and vomiting) and six single items (dyspnea, insomnia, loss of appetite,  
12  
13 176 constipation, diarrhea, and financial impact), all scored from 1 (not at all) to 4 (very much)) and  
14  
15 177 a global health status scale with ranges from 1 (very poor) to 7 (excellent). The EORTC QLQ-  
16  
17 178 NMIBC24 contains six scales (urinary symptoms, malaise, future worries, bloating and  
18  
19 179 flatulence, sexual function, and male sexual function) and five single items (intravesical  
20  
21 180 treatment issues, sexual intimacy, risk of contaminating partner, sexual enjoyment, female  
22  
23 181 sexual problems) scored from 1 (not at all) to 4 (very much). All scores will be linearly  
24  
25 182 transformed to a 0 to 100 scale.  
26  
27  
28  
29

30 184 Furthermore, at T3mo patients are asked to report whether they are aware of possible risk  
31  
32 185 factors for (bladder) cancer, received lifestyle advice from their physician, and what their  
33  
34 186 attitudes are towards physicians giving lifestyle advice.  
35  
36  
37  
38  
39  
40  
41  
42  
43  
44  
45  
46  
47  
48  
49  
50  
51  
52  
53  
54  
55  
56  
57  
58  
59  
60

187 **Table 1** Overview of data collection in UroLife at the four time points

| Included topics                                    | T6wk                                                                                                                                                                               | T3mo | T15mo | T51mo |   |
|----------------------------------------------------|------------------------------------------------------------------------------------------------------------------------------------------------------------------------------------|------|-------|-------|---|
| <b>Questionnaires</b>                              |                                                                                                                                                                                    |      |       |       |   |
| <i>Sociodemographic data</i>                       | Date of birth, gender, living situation, marital status, country of birth of participant, father, mother, race, highest level of education, working history, occupational exposure | X    |       |       |   |
| <i>Anthropometry</i>                               | Height at diagnosis, weight two years before diagnosis, weight at age 18 years, average weight during adult life                                                                   | X    |       |       |   |
|                                                    | Current body weight, waist and hip circumference                                                                                                                                   | X    | X     | X     | X |
| <i>Lifestyle</i>                                   | Current and past smoking behaviour, environmental smoke exposure                                                                                                                   | X    | X     | X     | X |
|                                                    | Short Questionnaire to Assess Health-enhancing physical activity [26]                                                                                                              | X    | X     | X     | X |
|                                                    | Frequency and amount of alcohol consumption during week and weekend days                                                                                                           | X    | X     | X     | X |
|                                                    | Changes in eating habits and reasons for/type of changes                                                                                                                           |      | X     | X     | X |
| <i>Medical history</i>                             | Previously diagnosed with cancer, family history of cancer                                                                                                                         | X    |       |       |   |
|                                                    | Comorbidities, medication use, dietary supplement use                                                                                                                              | X    | X     | X     | X |
| <i>Questions for females</i>                       | Menstruation, menopause, use of contraceptives, use of hormone replacement therapy                                                                                                 | X    | X     | X     | X |
|                                                    | Pregnancy                                                                                                                                                                          | X    |       |       |   |
| <i>Diet</i>                                        | 163- item Food Frequency Questionnaire                                                                                                                                             | X    | X     | X     | X |
| <i>HRQOL</i>                                       | EORTC QLQ-C30 [31] and EORTC QLQ-NMIBC24 [32]                                                                                                                                      | X    | X     | X     | X |
| <i>Awareness risk factors and lifestyle advice</i> | Awareness of cancer risk factors, received lifestyle advice, attitudes towards lifestyle advice                                                                                    |      | X     |       |   |
| <b>Four-day diary</b>                              |                                                                                                                                                                                    |      |       |       |   |
|                                                    | Frequency micturition, amount and type of fluid intake                                                                                                                             |      | X     | X     | X |
| <b>Blood</b>                                       |                                                                                                                                                                                    |      |       |       |   |
|                                                    | EDTA whole blood for DNA isolation                                                                                                                                                 |      | X     |       |   |
|                                                    | EDTA plasma, heparin plasma                                                                                                                                                        |      | X     | X     |   |
| <b>Tissue</b>                                      |                                                                                                                                                                                    |      |       |       |   |
|                                                    | Formalin-fixed paraffin-embedded tissue of the primary tumour                                                                                                                      | X    |       |       |   |
| <b>Clinical data</b>                               |                                                                                                                                                                                    |      |       |       |   |
|                                                    | Disease characteristics, therapy                                                                                                                                                   | X    | X     | X     | X |
|                                                    | Recurrence and progression                                                                                                                                                         |      |       | X     | X |



1  
2  
3 189 *Blood samples*  
4

5 190 Non-fasting blood samples are collected at T3mo and T15mo. At T3mo, 10 ml EDTA  
6  
7 191 whole blood (for DNA isolation), 10 ml EDTA plasma and 10 ml heparin plasma is  
8  
9 192 collected. At T15mo, 10 ml EDTA plasma and 10 ml heparin plasma is collected.  
10  
11 193 Heparin plasma tubes are wrapped in aluminum foil to protect them from light. All blood  
12  
13 194 samples are collected, processed and stored at -80°C locally in the participating  
14  
15 195 hospitals according to a standard protocol before transportation on dry ice to the  
16  
17 196 Radboud Biobank. The blood samples are stored in the Radboud Biobank at -80°C for  
18  
19 197 future analyses of genetic and other biomarkers. Analysis of heparin plasma levels of  
20  
21 198 nine biomarkers of fruit and vegetable consumption is planned. Concentration of six  
22  
23 199 carotenoids (i.e. alpha-carotene, beta-carotene, beta-cryptoxanthin, lutein, lycopene  
24  
25 200 and zeaxanthin), alpha-tocopherol, beta- and gamma-tocopherol and retinol were  
26  
27 201 measured by HPLC (Thermo Scientific Accela LC system; Thermo Fisher Scientific) and  
28  
29 202 analyzed by using ChromQuest 5.0, Version 3.2.1 software (Thermo Fisher Scientific).  
30  
31  
32  
33

34 204 *Tumour samples*  
35

36 205 From patients diagnosed with T1 NMIBC, tumour specimens will be collected in two batches  
37  
38 206 in 2019 and 2021. Tumour blocks will be identified by using the PALGA foundation and  
39  
40 207 retrieved using the Dutch National Tissuebank Portal (DNTP) from the local pathology  
41  
42 208 laboratories. Pathology review will be performed and tissue microarrays will be constructed.  
43  
44 209 Molecular subtypes will be assessed by immunohistochemistry in 2021. As the development  
45  
46 210 of a molecular classification system for NMIBC is still in progress and no consensus system  
47  
48 211 is available yet,[33] we will use the most suitable evidence-based subtyping method that will  
49  
50 212 then be available.  
51  
52  
53  
54

55 214 *Clinical data*  
56

57 215 For all patients with NMIBC, information about disease characteristics and therapy for the  
58  
59 216 initial tumour is collected from the medical records by data managers of the Netherlands  
60

1  
2  
3 217 Cancer Registry. Information about tumour characteristics includes incidence date, clinical  
4  
5 218 (cTNM) and post-surgical (pTNM) stage,[34] tumour grade, concomitant carcinoma in situ,  
6  
7 219 multifocality, number of tumours and histology. With respect to therapy, information is  
8  
9 220 collected on type of cystoscopy (white or blue light) and on transurethral resection (TUR), i.e.  
10  
11 221 date of TUR, presence of detrusor in the surgical specimen, and presence of lymphovascular  
12  
13 222 invasion. Furthermore, data on local treatment (e.g., intravesical chemotherapy, BCG) with  
14  
15 223 start and stop dates and, if applicable, on cystectomy (e.g., date, type) are collected.  
16  
17  
18 224

19  
20 225 Data on clinical outcomes, i.e. recurrence and progression, with dates of diagnosis, tumour  
21  
22 226 characteristics, and therapy is also collected from the medical records by data managers of  
23  
24 227 the Netherlands Cancer Registry. Information on vital status is collected by linkage with the  
25  
26 228 Personal Records Database. All patients will be followed for at least 5 years.  
27  
28 229

### 30 230 **Power considerations & Data analysis**

31  
32 231 Risk of recurrence (or progression) will be evaluated as time to first recurrence (or  
33  
34 232 progression). The association of pre- and post-diagnostic lifestyle factors, as well as changes  
35  
36 233 in lifestyle factors, with risk of recurrence and progression will be evaluated by estimating  
37  
38 234 hazard ratios and 95% confidence intervals using Cox proportional hazards regression  
39  
40 235 analyses. All analyses will be adjusted for age, gender, tumour characteristics, and other  
41  
42 236 known confounders. Analytical techniques for longitudinal data and multiple outcomes will  
43  
44 237 also be explored and applied. Our power calculation is based on 1,100 patients who will be  
45  
46 238 followed for five years. For comparing the highest (n=275) vs. lowest quartile (n=275) of a  
47  
48 239 lifestyle factor (or vice versa), this study will be sufficiently powered (two-sided alpha=0.05,  
49  
50 240 power 80%) to detect a hazard ratio of  $\geq 1.5$  or  $\geq 1.3$  (or  $\leq 0.7$  or  $\leq 0.8$ ) when assuming a five-  
51  
52 241 year recurrence risk of 31% or 78%, [35] respectively. [36, 37] With an assumed loss to follow-  
53  
54 242 up of 25% after five years, detectable hazard ratios will increase to  $\geq 1.6$  or  $\geq 1.4$  (or  $\leq 0.6$  or  
55  
56 243  $\leq 0.7$ ), respectively. Lower hazard ratios can be detected when lifestyle factors are modeled  
57  
58 244 continuously.  
59  
60

1  
2  
3 245 The association of lifestyle factors with HRQOL will be evaluated using longitudinal mixed  
4  
5 246 model analyses, taking into account the within-subject variation in lifestyle and HRQOL over  
6  
7 247 time and the between-subject variation. All analyses will be adjusted for age, gender, tumour  
8  
9 248 characteristics, and other known confounders. Since we expect that the between-subject  
10  
11 249 variation in lifestyle and HRQOL will be much larger than the within-subject variation, most  
12  
13 250 information will come from the association observed between subjects and not from the  
14  
15 251 association observed within subjects over time, Therefore, our power calculation is based on  
16  
17 252 a cross-sectional correlation at one time point. With 825 patients (assuming a loss to follow-  
18  
19 253 up of 25%) and using 10 predictor variables, we have 80% power to detect a small  
20  
21 254 correlation (Cohen's  $f^2$  of 0.02).[38, 39] Power will be higher when using repeated  
22  
23 255 measurements over time, especially when there is within-subject variation of lifestyle factors  
24  
25 256 and HRQOL over time.  
26  
27  
28  
29

257

### 258 **Cohort status**

30  
31  
32 259 Medical ethical approval was obtained on 17 January 2014. Patient recruitment started in  
33  
34 260 May 2014. Between 8 May 2014 and 25 April 2017, 2,133 patients with NMIBC initially  
35  
36 261 diagnosed with Ta, T1, or Tis tumours have been identified and invited to participate in  
37  
38 262 UroLife. Of these invited patients, 1,193 patients agreed to participate and 77 dropped out  
39  
40 263 before filling out the first questionnaires (response rate 52%). Since May 2017, recruitment of  
41  
42 264 patients with T1 (but not Ta or Tis) tumours has continued and is still ongoing. We aim to  
43  
44 265 recruit a total of at least 700 patients with T1 bladder cancer, and the projected date of  
45  
46 266 recruitment completion is April 2021.  
47  
48  
49

267

### 268 **DISCUSSION**

50  
51  
52 269 The UroLife study is one of the largest multicenter prospective cohort studies on lifestyle and  
53  
54 270 NMIBC outcomes worldwide. UroLife will provide new and comprehensive insights into  
55  
56 271 whether lifestyle habits (or habit changes) are related to NMIBC outcomes and HRQOL, and  
57  
58 272 whether these relations differ by tumour stage and molecular subtype. Unique features of  
59  
60

1  
2  
3 273 UroLife are the recruitment of patients shortly after diagnosis, collection of extensive dietary,  
4  
5 274 lifestyle, medical, and HRQOL data at multiple time points after diagnosis, collection of blood  
6  
7 275 (for DNA and biomarker analysis), and the availability of tumour tissue samples (for  
8  
9 276 molecular classification).

10  
11 277 As in many prospective cohort studies, non-participation may limit the generalisability of our  
12  
13 278 findings. In addition, loss to follow-up may limit the validity of our findings. Information bias  
14  
15 279 due to reliance on recall and self-report, or due to missing data, may be another potential  
16  
17 280 limitation. Although our study is large, we intend to combine our dataset in the future with  
18  
19 281 other similar prospective studies in NMIBC to increase statistical power for subgroup  
20  
21 282 analyses.

22  
23  
24 283 If the results of this study show that lifestyle factors are associated with clinical outcomes in  
25  
26 284 NMIBC patients and these results are confirmed by other prospective studies or randomised  
27  
28 285 trials, lifestyle recommendations and lifestyle interventions can be developed. Patients  
29  
30 286 diagnosed with NMIBC could then be advised by their physician about their lifestyle and/or  
31  
32 287 referred to a lifestyle intervention (e.g. smoking cessation program, exercise program). Thus,  
33  
34 288 our ultimate aim is to provide personalized evidence-based lifestyle advice to patients with  
35  
36 289 NMIBC, also according to tumour stage and molecular subtype, to enable them to have an  
37  
38 290 influence on their clinical outcome.

39  
40  
41 291

## 42 43 292 **ETHICS AND DISSEMINATION**

44  
45 293 The study protocol has been approved by the Committee for Human Research region  
46  
47 294 Arnhem-Nijmegen (CMO 2013-494). Patients who agree to participate in the study provide  
48  
49 295 written informed consent. The findings from our cohort study will be disseminated through  
50  
51 296 peer-reviewed scientific journals, and presentations at (inter)national scientific meetings.  
52  
53 297 Patients will be informed about the progress and results of this study through biannual  
54  
55 298 newsletters and through the website of the study (<https://www.radboudumc.nl/trials/urolife>)  
56  
57 299 and of the bladder cancer patient association (<https://www.blaasofnierkanker.nl/>). Also,  
58  
59 300 presentations will be given at contact days of the bladder cancer patient association.

1  
2  
3 301 **DECLARATIONS**  
4

5 302

6  
7 303 **Authors' contributions**  
8

9 304 AV, LALMK, AJW, EK, and KKHA contributed to the conception and design of the study. AV  
10  
11 305 provides overall study management and coordinates the project. EW has contributed and  
12  
13 306 LdG contributes to data collection. LdG, EW and AV drafted the manuscript. All authors have  
14  
15 307 critically read and revised the manuscript. All authors approved the final version of the  
16  
17 308 manuscript.  
18

19  
20 309

21  
22 310 **Funding**  
23

24 311 This work was supported by Alpe d'HuZes/Dutch Cancer Society (KUN 2013-5926) and  
25  
26 312 Dutch Cancer Society (Project no. 11179). Sponsors were not involved in the study design  
27  
28 313 nor will they be in the collection, analysis, and interpretation of data, or in the publications  
29  
30 314 that will result from this study.  
31

32  
33 315

34 316 **Competing interests**  
35

36 317 The authors declare that they have no competing interests.  
37  
38 318

39  
40  
41 319 **Availability of data and material**  
42

43 320 Data and material are not yet available since enrollment to the study is still ongoing and data  
44  
45 321 collection has not been completed yet. After completion of data collection, data will be made  
46  
47 322 available by the corresponding author upon reasonable request.  
48

49  
50 323

51 324 **Acknowledgements**  
52

53 325 We are grateful to all the patients who participate in this study and we would like to thank the  
54  
55 326 following hospitals for their involvement in recruitment for the UroLife study: Amphia  
56  
57 327 Ziekenhuis, Breda/Oosterhout (Drs. D.K.E. van der Schoot); Ziekenhuis Bernhoven, Uden  
58  
59 328 (Drs. A.Q.H.J. Niemer); Canisius-Wilhelmina Ziekenhuis, Nijmegen (Dr. D.M. Somford);  
60

1  
2  
3 329 Catharina Ziekenhuis, Eindhoven (Dr. E.L. Koldewijn); Deventer Ziekenhuis, Deventer (Drs.  
4  
5 330 P.L.M. van den Tillaar); Elkerliek Ziekenhuis, Helmond (Drs. E.W. Stapper †, Drs. P.J. van  
6  
7 331 Hest); Gelre Ziekenhuizen, Apeldoorn/Zutphen (Drs. D.M. Bochove-Overgaauw); Isala  
8  
9 332 Klinieken, Zwolle (Dr. E. te Slaa); Jeroen Bosch Ziekenhuis, 's-Hertogenbosch (Dr. J.R.  
10  
11 333 Oddens; Dr. S. van der Meer); Meander Medisch Centrum, Amersfoort (Drs. F.S. van Rey);  
12  
13 334 Medisch Spectrum Twente, Enschede (Dr. M. Asselman); Maxima Medisch Centrum,  
14  
15 335 Veldhoven/Eindhoven (Dr. L.M.C.L. Fossion); Maasziekenhuis Pantein, Boxmeer (Drs. E.  
16  
17 336 van Boven); Radboudumc, Nijmegen (Prof. Dr. J.A. Witjes); Rijnstate,  
18  
19 337 Arnhem/Velp/Zevenaar (Drs. C.J. Wijburg); Slingeland Ziekenhuis, Doetinchem (Drs. A.D.H.  
20  
21 338 Geboers); St. Anna Ziekenhuis, Geldrop (Drs. A. Sonneveld); Elisabeth-TweeSteden  
22  
23 339 Ziekenhuis, Tilburg/Waalwijk (Dr. P.J.M. Kil); St. Jansdal Ziekenhuis, Harderwijk (Drs. W.J.  
24  
25 340 Kniestedt); VieCuri, Venlo (Drs. G. Yurdakul, Dr. A.H.P. Meier); Ziekenhuis Gelderse Vallei,  
26  
27 341 Ede (Drs. M.D.H. Kortleve); Ziekenhuisgroep Twente, Almelo/Hengelo (Dr. E.B. Cornel). In  
28  
29 342 addition, we thank Ms. Monique Eijgenberger for her assistance in data collection. We also  
30  
31 343 thank the data managers and research assistants of the Netherlands Cancer Registry held  
32  
33 344 by the Netherlands Comprehensive Cancer Organisation (IKNL) for inviting patients and  
34  
35 345 collecting the clinical data.  
36  
37  
38  
39 346  
40  
41  
42  
43  
44  
45  
46  
47  
48  
49  
50  
51  
52  
53  
54  
55  
56  
57  
58  
59  
60

## 347 REFERENCES

1. Bray F, Ferlay J, Soerjomataram I, et al. Global cancer statistics 2018: GLOBOCAN estimates of incidence and mortality worldwide for 36 cancers in 185 countries. *CA Cancer J Clin* 2018;68(6):394-424.
2. Babjuk M, Böhle A, Burger M, et al. EAU guidelines on non-muscle-invasive urothelial carcinoma of the bladder: update 2016. *Eur Urol* 2017;71(3):447-61.
3. Cambier S, Sylvester RJ, Collette L, et al. EORTC Nomograms and Risk Groups for Predicting Recurrence, Progression, and Disease-specific and Overall Survival in Non-Muscle-invasive Stage Ta-T1 Urothelial Bladder Cancer Patients Treated with 1-3 Years of Maintenance Bacillus Calmette-Guerin. *Eur Urol* 2016;69(1):60-9.
4. Sievert KD, Amend B, Nagele U, et al. Economic aspects of bladder cancer: what are the benefits and costs? *World J Urol* 2009;27(3):295-300.
5. Schmidt S, Francés A, Garin JAL, et al. Quality of life in patients with non-muscle-invasive bladder cancer: One-year results of a multicentre prospective cohort study. *Urol Oncol* 2015;33(1):19.e7-19.e15.
6. Ligibel J. Lifestyle factors in cancer survivorship. *J Clin Oncol* 2012;30(30):3697-704.
7. Mehra K, Berkowitz A, Sanft T. Diet, Physical Activity, and Body Weight in Cancer Survivorship. *Med Clin North Am.* 2017;101(6):1151-65.
8. van Osch FH, Jochems SH, van Schooten F-J, et al. Quantified relations between exposure to tobacco smoking and bladder cancer risk: a meta-analysis of 89 observational studies. *Int J Epidemiol* 2016;45(3):857-70.
9. Cumberbatch MGK, Jubber I, Black PC, et al. Epidemiology of Bladder Cancer: A Systematic Review and Contemporary Update of Risk Factors in 2018. *Eur Urol* 2018;74(6):784-95.
10. Sun J-W, Zhao L-G, Yang Y, et al. Obesity and risk of bladder cancer: a dose-response meta-analysis of 15 cohort studies. *PloS one* 2015;10(3):e0119313.
11. Keimling M, Behrens G, Schmid D, et al. The association between physical activity and bladder cancer: systematic review and meta-analysis. *Br J Cancer* 2014;110(7):1862-70.
12. World Cancer Research Fund/American Institute for Cancer Research. Continuous Update Project Expert Report 2018: Diet, nutrition, physical activity and bladder cancer. 2018, <https://www.wcrf.org/dietandcancer>
13. Crivelli JJ, Xylinas E, Kluth LA, et al. Effect of smoking on outcomes of urothelial carcinoma: a systematic review of the literature. *Eur Urol* 2014;65(4):742-54.
14. Hou L, Hong X, Dai M, et al. Association of smoking status with prognosis in bladder cancer: A meta-analysis. *Oncotarget* 2017;8(1):1278-89.
15. Westhoff E, Witjes JA, Fleshner NE, et al. Body Mass Index, Diet-Related Factors, and Bladder Cancer Prognosis: A Systematic Review and Meta-Analysis. *Bladder Cancer* 2018;4(1):91-112.



1  
2  
3  
4  
5  
6  
7  
8  
9  
10  
11  
12  
13  
14  
15  
16  
17  
18  
19  
20  
21  
22  
23  
24  
25  
26  
27  
28  
29  
30  
31  
32  
33  
34  
35  
36  
37  
38  
39  
40  
41  
42  
43  
44  
45  
46  
47  
48  
49  
50  
51  
52  
53  
54  
55  
56  
57  
58  
59  
60

- 401 16. Kluth LA, Xylinas E, Crivelli JJ, et al. Obesity is associated with worse outcomes in  
402 patients with T1 high grade urothelial carcinoma of the bladder. *J Urol*  
403 2013;190(2):480-6.  
404
- 405 17. Wyszynski A, Tanyos SA, Rees JR, et al. Body mass and smoking are modifiable risk  
406 factors for recurrent bladder cancer. *Cancer* 2014;120(3):408-14.  
407
- 408 18. Xu T, Zhu Z, Wang X, et al. Impact of body mass on recurrence and progression in  
409 Chinese patients with Ta, T1 urothelial bladder cancer. *Int Urol Nephrol*  
410 2015;47(7):1135-41.  
411
- 412 19. van der Heijden AG, Witjes JA. Recurrence, progression, and follow-up in non-  
413 muscle-invasive bladder cancer. *Eur Urol Suppl* 2009;8(7):556-62.  
414
- 415 20. Sjö Dahl G, Lauss M, Lövgren K, et al. A molecular taxonomy for urothelial carcinoma.  
416 *Clin Cancer Res* 2012;18:3377-86.  
417
- 418 21. Patschan O, Sjö Dahl G, Chebil G, et al. A molecular pathologic framework for risk  
419 stratification of stage T1 urothelial carcinoma. *Eur Urol* 2015;68(5):824-32.  
420
- 421 22. Jung A, Nielsen ME, Crandell JL, et al. Quality of Life in Non-Muscle-Invasive Bladder  
422 Cancer Survivors: A Systematic Review. *Cancer Nurs* Published Online First: 1 June  
423 2018. doi:10.1097/NCC.0000000000000606.  
424
- 425 23. Mohamed N, Gilbert F, Lee C, et al. Pursuing Quality in the application of bladder  
426 Cancer quality of Life Research. *Bladder Cancer* 2016;2(2):139-49.  
427
- 428 24. Gopalakrishna A, Longo TA, Fantony JJ, et al. Lifestyle factors and health-related  
429 quality of life in bladder cancer survivors: a systematic review. *J Cancer Surviv*  
430 2016;10(5):874-82.  
431
- 432 25. van de Poll-Franse LV, Horevoorts N, van Eenbergen M, et al. The Patient Reported  
433 Outcomes Following Initial treatment and Long term Evaluation of Survivorship  
434 registry: scope, rationale and design of an infrastructure for the study of physical and  
435 psychosocial outcomes in cancer survivorship cohorts. *Eur J Cancer*  
436 2011;47(14):2188-94.  
437
- 438 26. Wendel-Vos GW, Schuit AJ, Saris WH, et al. Reproducibility and relative validity of  
439 the short questionnaire to assess health-enhancing physical activity. *J Clin Epidemiol*  
440 2003;56(12):1163-9.  
441
- 442 27. de Hollander EL, Zwart L, de Vries SI, et al. The SQUASH was a more valid tool than  
443 the OBiN for categorizing adults according to the Dutch physical activity and the  
444 combined guideline. *J Clin Epidemiol* 2012;65(1):73-81.  
445
- 446 28. Wagenmakers R, van den Akker-Scheek I, Groothoff JW, et al. Reliability and validity  
447 of the short questionnaire to assess health-enhancing physical activity (SQUASH) in  
448 patients after total hip arthroplasty. *BMC Musculoskelet Disord* 2008;9(1):141.  
449
- 450 29. Siebelink E, Geelen A, de Vries JH. Self-reported energy intake by FFQ compared  
451 with actual energy intake to maintain body weight in 516 adults. *Br J Nutr*  
452 2011;106(2):274-81.  
453
- 454 30. NEVO-tabel (2011) Dutch Food Composition Database. Den Haag:  
455 RIVM/Voedingscentrum.



- 1  
2  
3 456  
4 457 31. Aaronson NK, Ahmedzai S, Bergman B, et al. The European Organization for  
5 458 Research and Treatment of Cancer QLQ-C30: a quality-of-life instrument for use in  
6 459 international clinical trials in oncology. *J Natl Cancer Inst* 1993;85(5):365-76.  
7 460  
8 461 32. Blazeby JM, Hall E, Aaronson NK, et al. Validation and reliability testing of the  
9 462 EORTC QLQ-NMIBC24 questionnaire module to assess patient-reported outcomes in  
10 463 non-muscle-invasive bladder cancer. *Eur Urol* 2014;66(6):1148-56.  
11 464  
12 465 33. Chandrasekar T, Erlich A, Zlotta AR. Molecular Characterization of Bladder Cancer.  
13 466 *Curr Urol Rep* 2018;19(12):107.  
14 467  
15 468 34. Babjuk M, Böhle A, Burger M, et al. EAU Guidelines on Non-Muscle-Invasive  
16 469 Urothelial Carcinoma of the Bladder: Update 2016. *Eur Urol* 2017;71(3):447-61.  
17 470  
18 471 35. Sylvester RJ, van der Meijden AP, Oosterlinck W, et al. Predicting recurrence and  
19 472 progression in individual patients with stage Ta T1 bladder cancer using EORTC risk  
20 473 tables: a combined analysis of 2596 patients from seven EORTC trials. *Eur Urol*  
21 474 2006;49(3):466-77.  
22 475  
23 476 36. Dupont WD, Plummer WD. Power and sample size calculations: a review and  
24 477 computer program. *Control Clin Trials* 1990;11(2):116-28.  
25 478  
26 479 37. Dupont WD, Plummer WD. PS: Power and Sample Size Calculation.  
27 480 <http://biostat.mc.vanderbilt.edu/wiki/Main/PowerSampleSize>. Accessed 16 January  
28 481 2019.  
29 482  
30 483 38. Faul F, Erdfelder E, Buchner A, et al. Statistical power analyses using G\* Power 3.1:  
31 484 Tests for correlation and regression analyses. *Behav Res Methods* 2009;41(4):1149-  
32 485 60.  
33 486  
34 487 39. Faul F, Erdfelder E, Buchner A, et al. G\*Power: Statistical Power Analyses for  
35 488 Windows and Mac. <http://www.gpower.hhu.de>. Accessed 16 January 2019.

38 489

39 490

1  
2  
3  
4  
5  
6  
7  
8  
9  
10  
11  
12  
13  
14  
15  
16  
17  
18  
19  
20  
21  
22  
23  
24  
25  
26  
27  
28  
29  
30  
31  
32  
33  
34  
35  
36  
37  
38  
39  
40  
41  
42  
43  
44  
45  
46  
47  
48  
49  
50  
51  
52  
53  
54  
55  
56  
57  
58  
59  
60

491 **FIGURE LEGENDS**

492 **Figure 1** Timeline and study design of the UroLife study.

For peer review only



Figure 1 Timeline and study design of the UroLife study.

# BMJ Open

## The UroLife study: Protocol for a Dutch prospective cohort on lifestyle habits in relation to non-muscle-invasive bladder cancer prognosis and health-related quality of life

|                                 |                                                                                                                                                                                                                                                                                                                                                                                                                                                   |
|---------------------------------|---------------------------------------------------------------------------------------------------------------------------------------------------------------------------------------------------------------------------------------------------------------------------------------------------------------------------------------------------------------------------------------------------------------------------------------------------|
| Journal:                        | <i>BMJ Open</i>                                                                                                                                                                                                                                                                                                                                                                                                                                   |
| Manuscript ID                   | bmjopen-2019-030396.R2                                                                                                                                                                                                                                                                                                                                                                                                                            |
| Article Type:                   | Protocol                                                                                                                                                                                                                                                                                                                                                                                                                                          |
| Date Submitted by the Author:   | 18-Sep-2019                                                                                                                                                                                                                                                                                                                                                                                                                                       |
| Complete List of Authors:       | de Goeij, Liesbeth; Radboudumc, Department for Health Evidence Westhoff, Ellen; Radboudumc, Department for Health Evidence Witjes, JA; Radboudumc, Department of Urology Aben, Katja; Netherlands Comprehensive Cancer Organisation; Radboudumc, Department for Health Evidence Kampman, Ellen; Wageningen University Kiemeney, Lambertus; Radboudumc, Department for Health Evidence Vrieling, Alina; Radboudumc, Department for Health Evidence |
| <b>Primary Subject Heading</b>: | Urology                                                                                                                                                                                                                                                                                                                                                                                                                                           |
| Secondary Subject Heading:      | Epidemiology                                                                                                                                                                                                                                                                                                                                                                                                                                      |
| Keywords:                       | Urological tumours < ONCOLOGY, EPIDEMIOLOGY, NUTRITION & DIETETICS                                                                                                                                                                                                                                                                                                                                                                                |
|                                 |                                                                                                                                                                                                                                                                                                                                                                                                                                                   |

SCHOLARONE™  
Manuscripts

1  
2  
3 1 **The UroLife study: Protocol for a Dutch prospective cohort on lifestyle habits in**  
4  
5 2 **relation to non-muscle-invasive bladder cancer prognosis and health-related quality of**  
6  
7 3 **life**  
8

9 4  
10  
11 5 Liesbeth de Goeij<sup>a</sup>, Ellen Westhoff<sup>a</sup>, J. Alfred Witjes<sup>b</sup>, Katja K.H. Aben<sup>a,c</sup>, Ellen Kampman<sup>d</sup>,  
12 6 Lambertus A.L.M. Kiemeney<sup>a,b</sup>, Alina Vrieling<sup>a\*</sup>  
13  
14  
15

16 7  
17  
18 8 <sup>a</sup> Radboud university medical center, Radboud Institute for Health Sciences, Nijmegen, The  
19 9 Netherlands  
20  
21

22  
23 10 <sup>b</sup> Radboud University Nijmegen Medical Center, Department of Urology, Nijmegen, The  
24 11 Netherlands  
25  
26

27  
28 12 <sup>c</sup> Netherlands Comprehensive Cancer Organisation, Utrecht, The Netherlands  
29  
30

31 13 <sup>d</sup> Wageningen University, Division of Human Nutrition and Health, Wageningen, The  
32 14 Netherlands  
33  
34

35  
36 15  
37

38  
39 16 **\*Corresponding author:** Dr. Alina Vrieling, Radboud university medical center, Department  
40 17 for Health Evidence (Mailbox 133), P.O. Box 9101, 6500 HB Nijmegen, The Netherlands.  
41  
42

43 18 Tel: +31 24 3616944, Fax: +31 24 3613505, e-mail: Alina.Vrieling@radboudumc.nl  
44  
45

46 19  
47

48 20 **Word count:** 3040  
49  
50

51 21  
52  
53  
54  
55  
56  
57  
58  
59  
60

## 22 **ABSTRACT**

### 23 **Introduction:**

24 Patients with non-muscle-invasive bladder cancer (NMIBC) have a good survival but are at  
25 high risk for tumour recurrence and disease progression. It is important to identify lifestyle  
26 habits that may reduce the risk of recurrence and progression and improve health-related  
27 quality of life (HRQOL). This paper describes the rationale and design of the UroLife study.  
28 The main aim of this study is to evaluate whether lifestyle habits are related to prognosis and  
29 HRQOL in patients with NMIBC.

### 30 **Methods and analysis:**

31 The UroLife study is a multi-centre prospective cohort study among more than 1,100 newly  
32 diagnosed patients with NMIBC recruited from 22 hospitals in the Netherlands. At six weeks  
33 and three, 15, and 51 months after diagnosis, participants fill out a general questionnaire,  
34 and questionnaires about their lifestyle habits and HRQOL. At three, 15, and 51 months after  
35 diagnosis, information about fluid intake and micturition is collected with a four-day  
36 diary. At three and 15 months after diagnosis, patients donate blood samples for DNA  
37 extraction and (dietary) biomarker analysis. Tumour samples are collected from all  
38 patients with T1 disease to assess molecular subtypes. Information about disease  
39 characteristics and therapy for the primary tumour and subsequent recurrences is collected  
40 from the medical records by the Netherlands Cancer Registry. Statistical analyses will be  
41 adjusted for age, gender, tumour characteristics and other known confounders.

### 42 **Ethics and dissemination:**

43 The study protocol has been approved by the Committee for Human Research region  
44 Arnhem-Nijmegen (CMO 2013-494). Patients who agree to participate in the study provide  
45 written informed consent. The findings from our study will be disseminated through peer-  
46 reviewed scientific journals and presentations at (inter)national scientific meetings. Patients  
47 will be informed about the progress and results of this study through biannual newsletters  
48 and through the website of the study and of the bladder cancer patient association.

49

1  
2  
3 50 **Keywords:** bladder cancer, diet, lifestyle, biomarkers, recurrence, prognosis, quality of life,  
4  
5 51 cohort, study protocol  
6  
7

8 52  
9

10  
11 53 **STRENGTHS AND LIMITATIONS OF THIS STUDY**  
12

- 13 54 • Large multicenter prospective cohort study of NMIBC patients recruited shortly after  
14 diagnosis  
15 55  
16  
17 56 • Extensive dietary, lifestyle, medical, and HRQOL data at multiple time points after  
18 diagnosis  
19 57  
20  
21 58 • Availability of blood samples at 3 and 15 months after diagnosis, and formalin-fixed,  
22 paraffin-embedded tumour tissue  
23 59  
24  
25 60 • Limited power for subgroup analyses  
26  
27  
28 61 • Loss to follow-up potentially influencing validity of results  
29  
30  
31 62

## 63 INTRODUCTION

64 Urinary bladder cancer is the sixth most common cancer in the male population worldwide  
65 and tenth if considering both genders.[1] Approximately 75% of patients is diagnosed with  
66 non-muscle-invasive (NMIBC, stages Ta, T1, and Tis) and 25% with muscle-invasive (MIBC,  
67 stages T2, T3, and T4) bladder cancer.[2] Patients with NMIBC have a good survival but are  
68 at high risk for tumour recurrence and disease progression.[3] They are therefore subjected  
69 to frequent follow-up by cystoscopy and treatment. This makes bladder cancer the most  
70 expensive cancer in terms of health care expenditures per patient per year.[4] The high  
71 recurrence rate may also impact health-related quality of life (HRQOL).[5] Lifestyle factors  
72 have been linked to the prognosis and quality of life in patients with several cancer types [6,  
73 7] but evidence in patients with NMIBC is scarce. If we can identify lifestyle habits that are  
74 related to the risk of recurrence and progression and HRQOL in patients with NMIBC,  
75 optimal interventions can be developed to improve their prognosis and HRQOL.

76 The primary risk factor for bladder cancer is smoking, which accounts for 43% of bladder  
77 cancer cases in men and 26% in women in Europe.[8] Other important risk factors for  
78 bladder cancer are occupational exposures to carcinogens like aromatic amines and  
79 polycyclic aromatic hydrocarbons (PAHs), family history, and specific low penetrance  
80 germline genetic variants.[9] Recent meta-analyses suggest that excess body weight [10]  
81 and physical inactivity [11] may also increase bladder cancer risk. The World Cancer  
82 Research Fund/American Institute for Cancer Research (The WCRF/AICR) report found  
83 probable evidence that arsenic in drinking water increases the risk of bladder, and limited  
84 suggestive evidence that higher consumption of fruit and vegetables and of tea decreases  
85 the risk of bladder cancer.[12] For other dietary and lifestyle factors, this report concluded  
86 that data were of too low quality, inconsistent, or the number of studies were insufficient to  
87 draw conclusions.[12]

88 Available evidence about the role of lifestyle habits on prognosis in patients with NMIBC is  
89 restricted to smoking [13, 14] and excess body weight.[15] A systematic review [13] and  
90 recent meta-analysis of 10 studies including a total of 6,307 patients with NMIBC [14] found



1  
2  
3 91 that current and former smokers at diagnosis had an approximately 25% increased risk of  
4  
5 92 recurrence compared to never smokers. Our recent meta-analysis [15] of three studies [16-  
6  
7 93 18] showed that overweight and obesity compared to normal weight at diagnosis were  
8  
9 94 associated with increased risk of recurrence but not progression in patients with NMIBC,  
10  
11 95 although power for progression was limited.[15] Smoking cessation and weight loss after  
12  
13 96 diagnosis in relation to clinical outcomes has hardly been investigated. Evidence for other  
14  
15 97 lifestyle habits, such as fluid intake and micturition, physical activity, and fruit and vegetable  
16  
17 98 consumption, is very limited or not available.[15] Also, most studies on lifestyle and NMIBC  
18  
19 99 prognosis included a heterogeneous study population with different tumour stages and  
20  
21 100 grades of bladder cancer. However, NMIBC prognosis is clearly different for these subgroups  
22  
23 101 [19] and may also differ by molecular subtype.[20, 21] Whether associations of lifestyle  
24  
25 102 habits with NMIBC prognosis are mediated and/or modified by tumour stage and by  
26  
27 103 molecular subtype has not yet been investigated.

28  
29 104 Despite the high frequency of surveillance and repeated treatments, relatively little is known  
30  
31 105 about the HRQOL of patients with NMIBC,[22] and research with validated bladder cancer-  
32  
33 106 specific instruments is needed.[23] A systematic review of five studies on lifestyle and  
34  
35 107 HRQOL in bladder cancer patients found some evidence for a positive association between  
36  
37 108 physical activity and HRQOL, but insufficient evidence to draw any conclusions for  
38  
39 109 consumption of fruit and vegetables or smoking cessation.[24]

40  
41 110 The aim of our study is to evaluate the association of pre- and post-diagnosis lifestyle habits  
42  
43 111 (and habit changes) with risk of recurrence and progression and HRQOL. Also, we want to  
44  
45 112 explore whether this association is mediated and/or modified by tumour stage and molecular  
46  
47 113 subtype.

48  
49  
50  
51 114  
52  
53  
54  
55  
56  
57  
58  
59  
60

## 115 **METHODS AND ANALYSIS**

116 The UroLife study (**U**rothelial cell cancer: **L**ifestyle, prognosis, and quality of **L**ife) is a  
117 prospective cohort study including patients with newly diagnosed NMIBC. The study has  
118 been designed to evaluate the association of lifestyle habits with risk of recurrence and  
119 progression and HRQOL. Patients are recruited in 22 hospitals in the East, South, and  
120 Central part of the Netherlands. Before the start of the study, permission was asked from all  
121 urologists of the participating hospitals to select and invite eligible patients from the  
122 Netherlands Cancer Registry (NCR), held by the Netherlands Comprehensive Cancer  
123 Organisation (IKNL). Once every 1 to 2 weeks, new patients are identified through IKNL  
124 using notification lists of the nationwide network and registry of histo- and cytopathology in  
125 the Netherlands (PALGA foundation). Approximately 4 weeks after diagnosis, patients are  
126 invited on behalf of their urologist to participate in this study. Patients who agree to  
127 participate provide a written informed consent.

### 129 **Patient population**

130 Eligible participants are Dutch speaking patients between 18 and 80 years old who are newly  
131 diagnosed with a histologically confirmed primary stage Ta, T1, and Tis NMIBC tumour and  
132 underwent a transurethral resection. Patients with a previous diagnosis of cancer in the past  
133 five years and those with a lymph node metastasis or distant metastasis are not eligible.

### 135 **Patient and public involvement**

136 Patients were not involved in the design, recruitment and conduct of the study.

### 138 **Data collection and management**

#### 139 *Questionnaires*

140 Participants are asked to complete self-administered web-based or paper-and-pencil-based  
141 questionnaires at six weeks (T6wk), three months (T3mo), 15 months (T15mo), and 51  
142 months (T51mo) after diagnosis (Figure 1, Table 1). Web-based questionnaires are collected

1  
2  
3 143 using the data collection tool of the Patient Reported Outcomes Following Initial treatment  
4  
5 144 and Long term Evaluation of Survivorship (PROFILES) registry.[25] Follow-up telephone  
6  
7 145 calls are made to non-responding participants and to respondents whose questionnaires  
8  
9 146 have missing items.

10  
11 147 The baseline questionnaire contains questions on demographics (age, sex, ethnicity,  
12  
13 148 education, living situation, occupation, marital status) and (family) history of cancer. All  
14  
15 149 questionnaires collect information about height, body weight, amount and frequency of  
16  
17 150 alcohol consumption during week- and weekend days, smoking habits, comorbidities and  
18  
19 151 the use of medication. Information on smoking habits is collected in detail, including age or  
20  
21 152 date of starting and stopping smoking, number of cigarettes smoked per day, duration of  
22  
23 153 smoking, and passive exposure to smoking. Information about habitual physical activity is  
24  
25 154 collected by using the previously validated Short QUestionnaire to ASsess Health-  
26  
27 155 enhancing physical activity (SQUASH),[26] which is fairly reliable and valid in an adult  
28  
29 156 population.[26-28] The SQUASH questionnaire assesses the average time, i.e. number of  
30  
31 157 days per week and hours and minutes per day, spent in commuting activities, leisure  
32  
33 158 time activities, household activities, and activities at work in a normal week in the past  
34  
35 159 month. At T3mo, T15mo, and T51mo, patients are also asked to measure and report their  
36  
37 160 waist and hip circumference.

38  
39 161  
40  
41 162 Habitual dietary intake is collected using a 163-item validated and reproducible self-  
42  
43 163 administered food frequency questionnaire that was developed by Wageningen  
44  
45 164 University.[29] The questionnaire contains questions about the frequency of consumption of  
46  
47 165 food products and the portion size during the previous year (T6wk) or the previous months  
48  
49 166 (T3mo, T15mo, and T51mo). Frequency and portion size of consumed food products are  
50  
51 167 multiplied to obtain their intake in grams per day. Nutrient intake is calculated using the  
52  
53 168 Dutch Food Composition Database (NEVO 2011).[30] Information about fluid intake and  
54  
55 169 micturition is collected with a four-day diary at T3mo, T15mo en T51mo.

56  
57  
58  
59  
60 170

1  
2  
3 171 HRQOL is assessed at all four time points with the validated European Organisation for  
4  
5 172 Research and Treatment of Cancer (EORTC) QLQ-C30 [31] and a 24-item module for patients  
6  
7 173 with NMIBC, i.e. the EORTC QLQ-NMIBC24.[32] The EORTC QLQ-C30 contains five function  
8  
9 174 scales (physical, role, cognitive, emotional and social functioning), three symptom scales  
10  
11 175 (fatigue, nausea, pain and vomiting) and six single items (dyspnea, insomnia, loss of appetite,  
12  
13 176 constipation, diarrhea, and financial impact), all scored from 1 (not at all) to 4 (very much)) and  
14  
15 177 a global health status scale with ranges from 1 (very poor) to 7 (excellent). The EORTC QLQ-  
16  
17 178 NMIBC24 contains six scales (urinary symptoms, malaise, future worries, bloating and  
18  
19 179 flatulence, sexual function, and male sexual function) and five single items (intravesical  
20  
21 180 treatment issues, sexual intimacy, risk of contaminating partner, sexual enjoyment, female  
22  
23 181 sexual problems) scored from 1 (not at all) to 4 (very much). All scores will be linearly  
24  
25 182 transformed to a 0 to 100 scale.  
26  
27  
28  
29

30 183  
31 184 Furthermore, at T3mo patients are asked to report whether they are aware of possible risk  
32  
33 185 factors for (bladder) cancer, received lifestyle advice from their physician, and what their  
34  
35 186 attitudes are towards physicians giving lifestyle advice.  
36  
37  
38  
39  
40  
41  
42  
43  
44  
45  
46  
47  
48  
49  
50  
51  
52  
53  
54  
55  
56  
57  
58  
59  
60

187 **Table 1** Overview of data collection in UroLife at the four time points

| Included topics                                    | T6wk                                                                                                                                                                               | T3mo | T15mo | T51mo |   |
|----------------------------------------------------|------------------------------------------------------------------------------------------------------------------------------------------------------------------------------------|------|-------|-------|---|
| <b>Questionnaires</b>                              |                                                                                                                                                                                    |      |       |       |   |
| <i>Sociodemographic data</i>                       | Date of birth, gender, living situation, marital status, country of birth of participant, father, mother, race, highest level of education, working history, occupational exposure | X    |       |       |   |
| <i>Anthropometry</i>                               | Height at diagnosis, weight two years before diagnosis, weight at age 18 years, average weight during adult life                                                                   | X    |       |       |   |
|                                                    | Current body weight, waist and hip circumference                                                                                                                                   | X    | X     | X     | X |
| <i>Lifestyle</i>                                   | Current and past smoking behaviour, environmental smoke exposure                                                                                                                   | X    | X     | X     | X |
|                                                    | Short Questionnaire to Assess Health-enhancing physical activity [26]                                                                                                              | X    | X     | X     | X |
|                                                    | Frequency and amount of alcohol consumption during week and weekend days                                                                                                           | X    | X     | X     | X |
|                                                    | Changes in eating habits and reasons for/type of changes                                                                                                                           |      | X     | X     | X |
| <i>Medical history</i>                             | Previously diagnosed with cancer, family history of cancer                                                                                                                         | X    |       |       |   |
|                                                    | Comorbidities, medication use, dietary supplement use                                                                                                                              | X    | X     | X     | X |
| <i>Questions for females</i>                       | Menstruation, menopause, use of contraceptives, use of hormone replacement therapy                                                                                                 | X    | X     | X     | X |
|                                                    | Pregnancy                                                                                                                                                                          | X    |       |       |   |
| <i>Diet</i>                                        | 163- item Food Frequency Questionnaire                                                                                                                                             | X    | X     | X     | X |
| <i>HRQOL</i>                                       | EORTC QLQ-C30 [31] and EORTC QLQ-NMIBC24 [32]                                                                                                                                      | X    | X     | X     | X |
| <i>Awareness risk factors and lifestyle advice</i> | Awareness of cancer risk factors, received lifestyle advice, attitudes towards lifestyle advice                                                                                    |      | X     |       |   |
| <b>Four-day diary</b>                              |                                                                                                                                                                                    |      |       |       |   |
|                                                    | Frequency micturition, amount and type of fluid intake                                                                                                                             |      | X     | X     | X |
| <b>Blood</b>                                       |                                                                                                                                                                                    |      |       |       |   |
|                                                    | EDTA whole blood for DNA isolation                                                                                                                                                 |      | X     |       |   |
|                                                    | EDTA plasma, heparin plasma                                                                                                                                                        |      | X     | X     |   |
| <b>Tissue</b>                                      |                                                                                                                                                                                    |      |       |       |   |
|                                                    | Formalin-fixed paraffin-embedded tissue of the primary tumour                                                                                                                      | X    |       |       |   |
| <b>Clinical data</b>                               |                                                                                                                                                                                    |      |       |       |   |
|                                                    | Disease characteristics, therapy                                                                                                                                                   | X    | X     | X     | X |
|                                                    | Recurrence and progression                                                                                                                                                         |      |       | X     | X |

1  
2  
3 189 *Blood samples*  
4

5 190 Non-fasting blood samples are collected at T3mo and T15mo. At T3mo, 10 ml EDTA  
6  
7 191 whole blood (for DNA isolation), 10 ml EDTA plasma and 10 ml heparin plasma is  
8  
9 192 collected. At T15mo, 10 ml EDTA plasma and 10 ml heparin plasma is collected.  
10  
11 193 Heparin plasma tubes are wrapped in aluminum foil to protect them from light. All blood  
12  
13 194 samples are collected, processed and stored at -80°C locally in the participating  
14  
15 195 hospitals according to a standard protocol before transportation on dry ice to the  
16  
17 196 Radboud Biobank. The blood samples are stored in the Radboud Biobank at -80°C for  
18  
19 197 future analyses of genetic and other biomarkers. Analysis of heparin plasma levels of  
20  
21 198 nine biomarkers of fruit and vegetable consumption is planned. Concentration of six  
22  
23 199 carotenoids (i.e. alpha-carotene, beta-carotene, beta-cryptoxanthin, lutein, lycopene  
24  
25 200 and zeaxanthin), alpha-tocopherol, beta- and gamma-tocopherol and retinol were  
26  
27 201 measured by HPLC (Thermo Scientific Accela LC system; Thermo Fisher Scientific) and  
28  
29 202 analyzed by using ChromQuest 5.0, Version 3.2.1 software (Thermo Fisher Scientific).  
30  
31  
32  
33

34 204 *Tumour samples*  
35

36 205 From patients diagnosed with T1 NMIBC, tumour specimens will be collected in two batches  
37  
38 206 in 2019 and 2021. Tumour blocks will be identified by using the PALGA foundation and  
39  
40 207 retrieved using the Dutch National Tissuebank Portal (DNTP) from the local pathology  
41  
42 208 laboratories. Pathology review will be performed and tissue microarrays will be constructed.  
43  
44 209 Molecular subtypes will be assessed by immunohistochemistry in 2021. As the development  
45  
46 210 of a molecular classification system for NMIBC is still in progress and no consensus system  
47  
48 211 is available yet,[33] we will use the most suitable evidence-based subtyping method that will  
49  
50 212 then be available.  
51  
52  
53  
54

55 214 *Clinical data*  
56

57 215 For all patients with NMIBC, information about disease characteristics and therapy for the  
58  
59 216 initial tumour is collected from the medical records by data managers of the Netherlands  
60

1  
2  
3 217 Cancer Registry. Information about tumour characteristics includes incidence date, clinical  
4  
5 218 (cTNM) and post-surgical (pTNM) stage,[34] tumour grade, concomitant carcinoma in situ,  
6  
7 219 multifocality, number of tumours and histology. With respect to therapy, information is  
8  
9 220 collected on type of cystoscopy (white or blue light) and on transurethral resection (TUR), i.e.  
10  
11 221 date of TUR, presence of detrusor in the surgical specimen, and presence of lymphovascular  
12  
13 222 invasion. Furthermore, data on local treatment (e.g., intravesical chemotherapy, BCG) with  
14  
15 223 start and stop dates and, if applicable, on cystectomy (e.g., date, type) are collected.  
16  
17  
18 224

19  
20 225 Data on clinical outcomes, i.e. recurrence and progression, with dates of diagnosis, tumour  
21  
22 226 characteristics, and therapy is also collected from the medical records by data managers of  
23  
24 227 the Netherlands Cancer Registry. Information on vital status is collected by linkage with the  
25  
26 228 Personal Records Database. All patients will be followed for at least 5 years.  
27  
28 229

### 30 230 **Power considerations & Data analysis**

31  
32 231 Risk of recurrence (or progression) will be evaluated as time to first recurrence (or  
33  
34 232 progression). The association of pre- and post-diagnostic lifestyle factors, as well as changes  
35  
36 233 in lifestyle factors, with risk of recurrence and progression will be evaluated by estimating  
37  
38 234 hazard ratios and 95% confidence intervals using Cox proportional hazards regression  
39  
40 235 analyses. All analyses will be adjusted for age, gender, tumour characteristics, and other  
41  
42 236 known confounders. Analytical techniques for longitudinal data and multiple outcomes will  
43  
44 237 also be explored and applied. Our power calculation is based on 1,100 patients who will be  
45  
46 238 followed for five years. For comparing the highest (n=275) vs. lowest quartile (n=275) of a  
47  
48 239 lifestyle factor (or vice versa), this study will be sufficiently powered (two-sided alpha=0.05,  
49  
50 240 power 80%) to detect a hazard ratio of  $\geq 1.5$  or  $\geq 1.3$  (or  $\leq 0.7$  or  $\leq 0.8$ ) when assuming a five-  
51  
52 241 year recurrence risk of 31% or 78%,[35] respectively.[36, 37] With an assumed loss to follow-  
53  
54 242 up of 25% after five years, detectable hazard ratios will increase to  $\geq 1.6$  or  $\geq 1.4$  (or  $\leq 0.6$  or  
55  
56 243  $\leq 0.7$ ), respectively. Lower hazard ratios can be detected when lifestyle factors are modeled  
57  
58 244 continuously.  
59  
60

1  
2  
3 245 The association of lifestyle factors with HRQOL will be evaluated using longitudinal mixed  
4  
5 246 model analyses, taking into account the within-subject variation in lifestyle and HRQOL over  
6  
7 247 time and the between-subject variation. All analyses will be adjusted for age, gender, tumour  
8  
9 248 characteristics, and other known confounders. Since we expect that the between-subject  
10  
11 249 variation in lifestyle and HRQOL will be much larger than the within-subject variation, most  
12  
13 250 information will come from the association observed between subjects and not from the  
14  
15 251 association observed within subjects over time, Therefore, our power calculation is based on  
16  
17 252 a cross-sectional correlation at one time point. With 825 patients (assuming a loss to follow-  
18  
19 253 up of 25%) and using 10 predictor variables, we have 80% power to detect a small  
20  
21 254 correlation (Cohen's  $f^2$  of 0.02).[38, 39] Power will be higher when using repeated  
22  
23 255 measurements over time, especially when there is within-subject variation of lifestyle factors  
24  
25 256 and HRQOL over time.  
26  
27  
28  
29

257

### 258 **Cohort status**

30  
31  
32 259 Medical ethical approval was obtained on 17 January 2014. Patient recruitment started in  
33  
34 260 May 2014. Between 8 May 2014 and 25 April 2017, 2,133 patients with NMIBC initially  
35  
36 261 diagnosed with Ta, T1, or Tis tumours have been identified and invited to participate in  
37  
38 262 UroLife. Of these invited patients, 1,193 patients agreed to participate and 77 dropped out  
39  
40 263 before filling out the first questionnaires (response rate 52%). Since May 2017, recruitment of  
41  
42 264 patients with T1 (but not Ta or Tis) tumours has continued and is still ongoing. We aim to  
43  
44 265 recruit a total of at least 700 patients with T1 bladder cancer, and the projected date of  
45  
46 266 recruitment completion is April 2021.  
47  
48  
49

267

### 268 **DISCUSSION**

50  
51  
52 269 The UroLife study is one of the largest multicenter prospective cohort studies on lifestyle and  
53  
54 270 NMIBC outcomes worldwide. UroLife will provide new and comprehensive insights into  
55  
56 271 whether lifestyle habits (or habit changes) are related to NMIBC outcomes and HRQOL, and  
57  
58 272 whether these relations differ by tumour stage and molecular subtype. Unique features of  
59  
60



1  
2  
3 273 UroLife are the recruitment of patients shortly after diagnosis, collection of extensive dietary,  
4  
5 274 lifestyle, medical, and HRQOL data at multiple time points after diagnosis, collection of blood  
6  
7 275 (for DNA and biomarker analysis), and the availability of tumour tissue samples (for  
8  
9 276 molecular classification).

11 277 As in many prospective cohort studies, non-participation may limit the generalisability of our  
12  
13 278 findings. In addition, loss to follow-up may limit the validity of our findings. Information bias  
14  
15 279 due to reliance on recall and self-report, or due to missing data, may be another potential  
16  
17 280 limitation. Although our study is large, we intend to combine our dataset in the future with  
18  
19 281 other similar prospective studies in NMIBC to increase statistical power for subgroup  
20  
21 282 analyses.

24 283 If the results of this study show that lifestyle factors are associated with clinical outcomes in  
25  
26 284 NMIBC patients and these results are confirmed by other prospective studies or randomised  
27  
28 285 trials, lifestyle recommendations and lifestyle interventions can be developed. Patients  
29  
30 286 diagnosed with NMIBC could then be advised by their physician about their lifestyle and/or  
31  
32 287 referred to a lifestyle intervention (e.g. smoking cessation program, exercise program). Thus,  
33  
34 288 our ultimate aim is to provide personalized evidence-based lifestyle advice to patients with  
35  
36 289 NMIBC, also according to tumour stage and molecular subtype, to enable them to have an  
37  
38 290 influence on their clinical outcome.

40  
41 291

## 42 43 292 **ETHICS AND DISSEMINATION**

45 293 The study protocol has been approved by the Committee for Human Research region  
46  
47 294 Arnhem-Nijmegen (CMO 2013-494). Patients who agree to participate in the study provide  
48  
49 295 written informed consent. The findings from our cohort study will be disseminated through  
50  
51 296 peer-reviewed scientific journals, and presentations at (inter)national scientific meetings.  
52  
53 297 Patients will be informed about the progress and results of this study through biannual  
54  
55 298 newsletters and through the website of the study (<https://www.radboudumc.nl/trials/urolife>)  
56  
57 299 and of the bladder cancer patient association (<https://www.blaasofnierkanker.nl/>). Also,  
58  
59 300 presentations will be given at contact days of the bladder cancer patient association.

1  
2  
3 301 **DECLARATIONS**  
4

5 302

6  
7 303 **Authors' contributions**  
8

9 304 AV, LALMK, AJW, EK, and KKHA contributed to the conception and design of the study. AV  
10  
11 305 provides overall study management and coordinates the project. EW has contributed and  
12  
13 306 LdG contributes to data collection. LdG, EW and AV drafted the manuscript. All authors have  
14  
15 307 critically read and revised the manuscript. All authors approved the final version of the  
16  
17 308 manuscript.  
18

19  
20 309

21  
22 310 **Funding**  
23

24 311 This work was supported by Alpe d'HuZes/Dutch Cancer Society (KUN 2013-5926) and  
25  
26 312 Dutch Cancer Society (Project no. 11179). Sponsors were not involved in the study design  
27  
28 313 nor will they be in the collection, analysis, and interpretation of data, or in the publications  
29  
30 314 that will result from this study.  
31

32  
33 315

34 316 **Competing interests**  
35

36 317 The authors declare that they have no competing interests.  
37  
38 318

39  
40  
41 319 **Availability of data and material**  
42

43 320 Data and material are not yet available since enrollment to the study is still ongoing and data  
44  
45 321 collection has not been completed yet. After completion of data collection, data will be made  
46  
47 322 available by the corresponding author upon reasonable request.  
48

49  
50 323

51 324 **Acknowledgements**  
52

53 325 We are grateful to all the patients who participate in this study and we would like to thank the  
54  
55 326 following hospitals for their involvement in recruitment for the UroLife study: Amphia  
56  
57 327 Ziekenhuis, Breda/Oosterhout (Drs. D.K.E. van der Schoot); Ziekenhuis Bernhoven, Uden  
58  
59 328 (Drs. A.Q.H.J. Niemer); Canisius-Wilhelmina Ziekenhuis, Nijmegen (Dr. D.M. Somford);  
60

1  
2  
3 329 Catharina Ziekenhuis, Eindhoven (Dr. E.L. Koldewijn); Deventer Ziekenhuis, Deventer (Drs.  
4  
5 330 P.L.M. van den Tillaar); Elkerliek Ziekenhuis, Helmond (Drs. E.W. Stapper †, Drs. P.J. van  
6  
7 331 Hest); Gelre Ziekenhuizen, Apeldoorn/Zutphen (Drs. D.M. Bochove-Overgaauw); Isala  
8  
9 332 Klinieken, Zwolle (Dr. E. te Slaa); Jeroen Bosch Ziekenhuis, 's-Hertogenbosch (Dr. J.R.  
10  
11 333 Oddens; Dr. S. van der Meer); Meander Medisch Centrum, Amersfoort (Drs. F.S. van Rey);  
12  
13 334 Medisch Spectrum Twente, Enschede (Dr. M. Asselman); Maxima Medisch Centrum,  
14  
15 335 Veldhoven/Eindhoven (Dr. L.M.C.L. Fossion); Maasziekenhuis Pantein, Boxmeer (Drs. E.  
16  
17 336 van Boven); Radboudumc, Nijmegen (Prof. Dr. J.A. Witjes); Rijnstate,  
18  
19 337 Arnhem/Velp/Zevenaar (Drs. C.J. Wijburg); Slingeland Ziekenhuis, Doetinchem (Drs. A.D.H.  
20  
21 338 Geboers); St. Anna Ziekenhuis, Geldrop (Drs. A. Sonneveld); Elisabeth-TweeSteden  
22  
23 339 Ziekenhuis, Tilburg/Waalwijk (Dr. P.J.M. Kil); St. Jansdal Ziekenhuis, Harderwijk (Drs. W.J.  
24  
25 340 Kniestedt); VieCuri, Venlo (Drs. G. Yurdakul, Dr. A.H.P. Meier); Ziekenhuis Gelderse Vallei,  
26  
27 341 Ede (Drs. M.D.H. Kortleve); Ziekenhuisgroep Twente, Almelo/Hengelo (Dr. E.B. Cornel). In  
28  
29 342 addition, we thank Ms. Monique Eijgenberger for her assistance in data collection. We also  
30  
31 343 thank the data managers and research assistants of the Netherlands Cancer Registry held  
32  
33 344 by the Netherlands Comprehensive Cancer Organisation (IKNL) for inviting patients and  
34  
35 345 collecting the clinical data.  
36  
37  
38  
39 346  
40  
41  
42  
43  
44  
45  
46  
47  
48  
49  
50  
51  
52  
53  
54  
55  
56  
57  
58  
59  
60

## 347 REFERENCES

1. Bray F, Ferlay J, Soerjomataram I, et al. Global cancer statistics 2018: GLOBOCAN estimates of incidence and mortality worldwide for 36 cancers in 185 countries. *CA Cancer J Clin* 2018;68(6):394-424.
2. Babjuk M, Böhle A, Burger M, et al. EAU guidelines on non-muscle-invasive urothelial carcinoma of the bladder: update 2016. *Eur Urol* 2017;71(3):447-61.
3. Cambier S, Sylvester RJ, Collette L, et al. EORTC Nomograms and Risk Groups for Predicting Recurrence, Progression, and Disease-specific and Overall Survival in Non-Muscle-invasive Stage Ta-T1 Urothelial Bladder Cancer Patients Treated with 1-3 Years of Maintenance Bacillus Calmette-Guerin. *Eur Urol* 2016;69(1):60-9.
4. Sievert KD, Amend B, Nagele U, et al. Economic aspects of bladder cancer: what are the benefits and costs? *World J Urol* 2009;27(3):295-300.
5. Schmidt S, Francés A, Garin JAL, et al. Quality of life in patients with non-muscle-invasive bladder cancer: One-year results of a multicentre prospective cohort study. *Urol Oncol* 2015;33(1):19.e7-19.e15.
6. Ligibel J. Lifestyle factors in cancer survivorship. *J Clin Oncol* 2012;30(30):3697-704.
7. Mehra K, Berkowitz A, Sanft T. Diet, Physical Activity, and Body Weight in Cancer Survivorship. *Med Clin North Am.* 2017;101(6):1151-65.
8. van Osch FH, Jochems SH, van Schooten F-J, et al. Quantified relations between exposure to tobacco smoking and bladder cancer risk: a meta-analysis of 89 observational studies. *Int J Epidemiol* 2016;45(3):857-70.
9. Cumberbatch MGK, Jubber I, Black PC, et al. Epidemiology of Bladder Cancer: A Systematic Review and Contemporary Update of Risk Factors in 2018. *Eur Urol* 2018;74(6):784-95.
10. Sun J-W, Zhao L-G, Yang Y, et al. Obesity and risk of bladder cancer: a dose-response meta-analysis of 15 cohort studies. *PloS one* 2015;10(3):e0119313.
11. Keimling M, Behrens G, Schmid D, et al. The association between physical activity and bladder cancer: systematic review and meta-analysis. *Br J Cancer* 2014;110(7):1862-70.
12. World Cancer Research Fund/American Institute for Cancer Research. Continuous Update Project Expert Report 2018: Diet, nutrition, physical activity and bladder cancer. 2018, <https://www.wcrf.org/dietandcancer>
13. Crivelli JJ, Xylinas E, Kluth LA, et al. Effect of smoking on outcomes of urothelial carcinoma: a systematic review of the literature. *Eur Urol* 2014;65(4):742-54.
14. Hou L, Hong X, Dai M, et al. Association of smoking status with prognosis in bladder cancer: A meta-analysis. *Oncotarget* 2017;8(1):1278-89.
15. Westhoff E, Witjes JA, Fleshner NE, et al. Body Mass Index, Diet-Related Factors, and Bladder Cancer Prognosis: A Systematic Review and Meta-Analysis. *Bladder Cancer* 2018;4(1):91-112.

1  
2  
3  
4  
5  
6  
7  
8  
9  
10  
11  
12  
13  
14  
15  
16  
17  
18  
19  
20  
21  
22  
23  
24  
25  
26  
27  
28  
29  
30  
31  
32  
33  
34  
35  
36  
37  
38  
39  
40  
41  
42  
43  
44  
45  
46  
47  
48  
49  
50  
51  
52  
53  
54  
55  
56  
57  
58  
59  
60

- 401 16. Kluth LA, Xylinas E, Crivelli JJ, et al. Obesity is associated with worse outcomes in  
402 patients with T1 high grade urothelial carcinoma of the bladder. *J Urol*  
403 2013;190(2):480-6.  
404
- 405 17. Wyszynski A, Tanyos SA, Rees JR, et al. Body mass and smoking are modifiable risk  
406 factors for recurrent bladder cancer. *Cancer* 2014;120(3):408-14.  
407
- 408 18. Xu T, Zhu Z, Wang X, et al. Impact of body mass on recurrence and progression in  
409 Chinese patients with Ta, T1 urothelial bladder cancer. *Int Urol Nephrol*  
410 2015;47(7):1135-41.  
411
- 412 19. van der Heijden AG, Witjes JA. Recurrence, progression, and follow-up in non-  
413 muscle-invasive bladder cancer. *Eur Urol Suppl* 2009;8(7):556-62.  
414
- 415 20. Sjö Dahl G, Lauss M, Lövgren K, et al. A molecular taxonomy for urothelial carcinoma.  
416 *Clin Cancer Res* 2012;18:3377-86.  
417
- 418 21. Patschan O, Sjö Dahl G, Chebil G, et al. A molecular pathologic framework for risk  
419 stratification of stage T1 urothelial carcinoma. *Eur Urol* 2015;68(5):824-32.  
420
- 421 22. Jung A, Nielsen ME, Crandell JL, et al. Quality of Life in Non-Muscle-Invasive Bladder  
422 Cancer Survivors: A Systematic Review. *Cancer Nurs* Published Online First: 1 June  
423 2018. doi:10.1097/NCC.0000000000000606.  
424
- 425 23. Mohamed N, Gilbert F, Lee C, et al. Pursuing Quality in the application of bladder  
426 Cancer quality of Life Research. *Bladder Cancer* 2016;2(2):139-49.  
427
- 428 24. Gopalakrishna A, Longo TA, Fantony JJ, et al. Lifestyle factors and health-related  
429 quality of life in bladder cancer survivors: a systematic review. *J Cancer Surviv*  
430 2016;10(5):874-82.  
431
- 432 25. van de Poll-Franse LV, Horevoorts N, van Eenbergen M, et al. The Patient Reported  
433 Outcomes Following Initial treatment and Long term Evaluation of Survivorship  
434 registry: scope, rationale and design of an infrastructure for the study of physical and  
435 psychosocial outcomes in cancer survivorship cohorts. *Eur J Cancer*  
436 2011;47(14):2188-94.  
437
- 438 26. Wendel-Vos GW, Schuit AJ, Saris WH, et al. Reproducibility and relative validity of  
439 the short questionnaire to assess health-enhancing physical activity. *J Clin Epidemiol*  
440 2003;56(12):1163-9.  
441
- 442 27. de Hollander EL, Zwart L, de Vries SI, et al. The SQUASH was a more valid tool than  
443 the OBiN for categorizing adults according to the Dutch physical activity and the  
444 combined guideline. *J Clin Epidemiol* 2012;65(1):73-81.  
445
- 446 28. Wagenmakers R, van den Akker-Scheek I, Groothoff JW, et al. Reliability and validity  
447 of the short questionnaire to assess health-enhancing physical activity (SQUASH) in  
448 patients after total hip arthroplasty. *BMC Musculoskelet Disord* 2008;9(1):141.  
449
- 450 29. Siebelink E, Geelen A, de Vries JH. Self-reported energy intake by FFQ compared  
451 with actual energy intake to maintain body weight in 516 adults. *Br J Nutr*  
452 2011;106(2):274-81.  
453
- 454 30. NEVO-tabel (2011) Dutch Food Composition Database. Den Haag:  
455 RIVM/Voedingscentrum.

- 1  
2  
3 456  
4 457 31. Aaronson NK, Ahmedzai S, Bergman B, et al. The European Organization for  
5 458 Research and Treatment of Cancer QLQ-C30: a quality-of-life instrument for use in  
6 459 international clinical trials in oncology. *J Natl Cancer Inst* 1993;85(5):365-76.  
7 460  
8 461 32. Blazeby JM, Hall E, Aaronson NK, et al. Validation and reliability testing of the  
9 462 EORTC QLQ-NMIBC24 questionnaire module to assess patient-reported outcomes in  
10 463 non-muscle-invasive bladder cancer. *Eur Urol* 2014;66(6):1148-56.  
11 464  
12 465 33. Chandrasekar T, Erlich A, Zlotta AR. Molecular Characterization of Bladder Cancer.  
13 466 *Curr Urol Rep* 2018;19(12):107.  
14 467  
15 468 34. Babjuk M, Böhle A, Burger M, et al. EAU Guidelines on Non-Muscle-Invasive  
16 469 Urothelial Carcinoma of the Bladder: Update 2016. *Eur Urol* 2017;71(3):447-61.  
17 470  
18 471 35. Sylvester RJ, van der Meijden AP, Oosterlinck W, et al. Predicting recurrence and  
19 472 progression in individual patients with stage Ta T1 bladder cancer using EORTC risk  
20 473 tables: a combined analysis of 2596 patients from seven EORTC trials. *Eur Urol*  
21 474 2006;49(3):466-77.  
22 475  
23 476 36. Dupont WD, Plummer WD. Power and sample size calculations: a review and  
24 477 computer program. *Control Clin Trials* 1990;11(2):116-28.  
25 478  
26 479 37. Dupont WD, Plummer WD. PS: Power and Sample Size Calculation.  
27 480 <http://biostat.mc.vanderbilt.edu/wiki/Main/PowerSampleSize>. Accessed 16 January  
28 481 2019.  
29 482  
30 483 38. Faul F, Erdfelder E, Buchner A, et al. Statistical power analyses using G\* Power 3.1:  
31 484 Tests for correlation and regression analyses. *Behav Res Methods* 2009;41(4):1149-  
32 485 60.  
33 486  
34 487 39. Faul F, Erdfelder E, Buchner A, et al. G\*Power: Statistical Power Analyses for  
35 488 Windows and Mac. <http://www.gpower.hhu.de>. Accessed 16 January 2019.

38 489

39 490

1  
2  
3  
4  
5  
6  
7  
8  
9  
10  
11  
12  
13  
14  
15  
16  
17  
18  
19  
20  
21  
22  
23  
24  
25  
26  
27  
28  
29  
30  
31  
32  
33  
34  
35  
36  
37  
38  
39  
40  
41  
42  
43  
44  
45  
46  
47  
48  
49  
50  
51  
52  
53  
54  
55  
56  
57  
58  
59  
60

491 **FIGURE LEGENDS**

492 **Figure 1** Timeline and study design of the UroLife study.

For peer review only





Figure 1 Timeline and study design of the UroLife study.
